# Supplementary material for: Minimal catalytic dissipative assemblies via cooperation of an amino acid, a nucleobase precursor and a cofactor
Source: Royal Society of Chemistry journal article supplement (doi:10.1039/d5sc00827a), 2025-01-01
Supplement: d5sc00827a1.pdf [file d5sc00827a1.pdf]

## **Minimal Catalytic Dissipative Assemblies via Cooperation of Amino acid, Nucleobase precursor and Cofactor**

Syed Pavel Afrose<sup>+,a</sup>, Soumili Roy<sup>+,a</sup>, Pratip Bhattacharyya<sup>a</sup>, Ajeet Kumar Singh<sup>b</sup>, Lisa Roy<sup>c</sup> and Dibyendu Das<sup>\*a</sup>

<sup>a</sup>Department of Chemical Sciences and Centre for Advanced Functional Materials, Indian Institute of Science Education and Research (IISER) Kolkata, Mohanpur 741246, India. Email: [dasd@iiserkol.ac.in](mailto:dasd@iiserkol.ac.in)

<sup>b</sup>Institute of Chemical Technology Mumbai, Indian Oil Odisha Campus Bhubaneswar, Gajapati Nagar, Bhubaneswar, Odisha 751013, India. Email: [L.Roy@iocb.ictmumbai.edu.in](mailto:L.Roy@iocb.ictmumbai.edu.in)

<sup>c</sup>Department of Education, Indian Institute of Technology Kharagpur, Kharagpur 721302, India.

+ contributed equally

**Corresponding author:** Dibyendu Das

**Email:** [dasd@iiserkol.ac.in](mailto:dasd@iiserkol.ac.in)

## Materials

1,3,5-triazine-2,4,6-triamine (**T**), 4-hydroxy-3-methoxybenzoic acid (**AR**), hemin (**Cf**), histidine, glacial acetic acid, HBTU and triethylamine were purchased from SRL Chemicals. 7-hydroxycoumarin, Nile red, Rhodamine 110, 1,3,5-trimethoxy benzene, hydrogen peroxide, HRP, 1,1,2,2 tetrachloroethane and all solvents were purchased from Sigma Aldrich Merck. Milli-Q water was used throughout the study.

## Synthesis

### Synthesis and characterization of AA:

#### Step 1: Synthesis of N-acetylhistidine:

AA was synthesised by following previous literature.<sup>1</sup> Briefly, to a suspension of L-histidine (632 mg, 4.07 mmol) in glacial acetic acid (24 mL), acetic anhydride (0.4 mL, 440 mg, 4.32 mmol) was added. The solvent was evaporated. After refluxing the reaction mixture for 15 h. The yellow oil formed was taken in H<sub>2</sub>O (40 mL) and was extracted with CHCl<sub>3</sub>. After evaporating the aqueous layer, the residue was dissolved in H<sub>2</sub>O (15 mL) and was again evaporated twice. The oil was finally taken in H<sub>2</sub>O (10 mL) and acetone (30 mL) was added afterwards. The mixture was kept at 0 °C overnight which led to the formation of a colourless precipitate. The precipitate was isolated and washed with a mixture of H<sub>2</sub>O and acetone (3:7), only acetone (30 mL) and Et<sub>2</sub>O (30 mL). Drying under high vacuum yielded N-acetylhistidine as a colourless solid.

<sup>1</sup>H NMR (D<sub>2</sub>O, 500 MHz)  $\delta$  (ppm): 1.97 (s, 3H), 3.08 (dd, 1H), 3.25 (dd, 1H), 4.48 (dd, 1H), 7.25 (s, 1H), 8.57 (s, 1H).

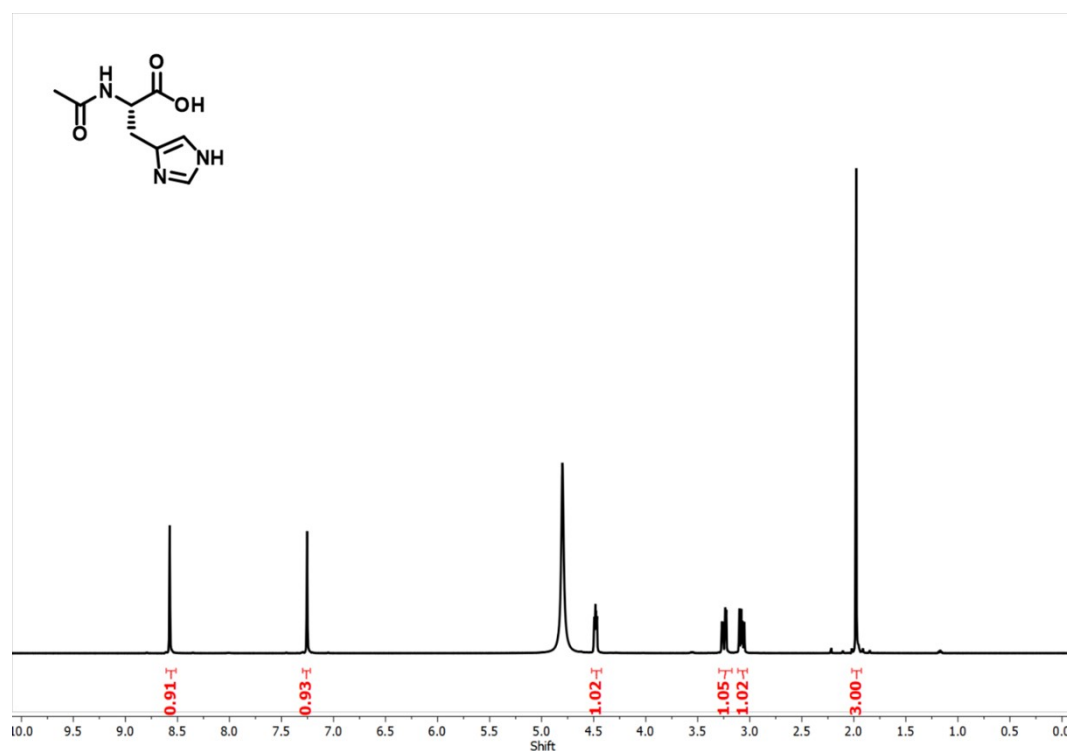

<sup>1</sup>H NMR of N-acetylhistidine

#### Step 2: Synthesis of N-acetyl histidine methyl ester (AA)

N-acetylhistidine (760 mg, 3.9 mmol) was taken in MeOH. The formed suspension was treated with thionyl chloride (1.25 mL, 2.03 g, 17.1 mmol) at 0 °C under N<sub>2</sub> atmosphere. The mixture was stirred for 16 h at room temperature. The solvent was evaporated, and the residue was taken in H<sub>2</sub>O (50 mL) and solid NaHCO<sub>3</sub> was added to adjust the pH to 5. The oily residue formed after evaporation of the solvent was purified via column chromatography on silica gel (EtOAc/MeOH) to give N-acetyl histidine methyl ester (**AA**) as a colourless solid.

$^1\text{H}$  NMR (DMSO- $d_6$ , 500 MHz)  $\delta$  (ppm): 1.81 (s, 3H), 2.82-2.93 (m, 2H), 3.57 (s, 3H), 4.42-4.47 (m, 1H), 6.81 (s, 1H), 7.54 (s, 1H), 8.31 (d, 1H).  
ESI-MS ( $m/z$ ) calcd. for  $[\text{M} + \text{H}^+]$ : 212.1030; found: 212.1033

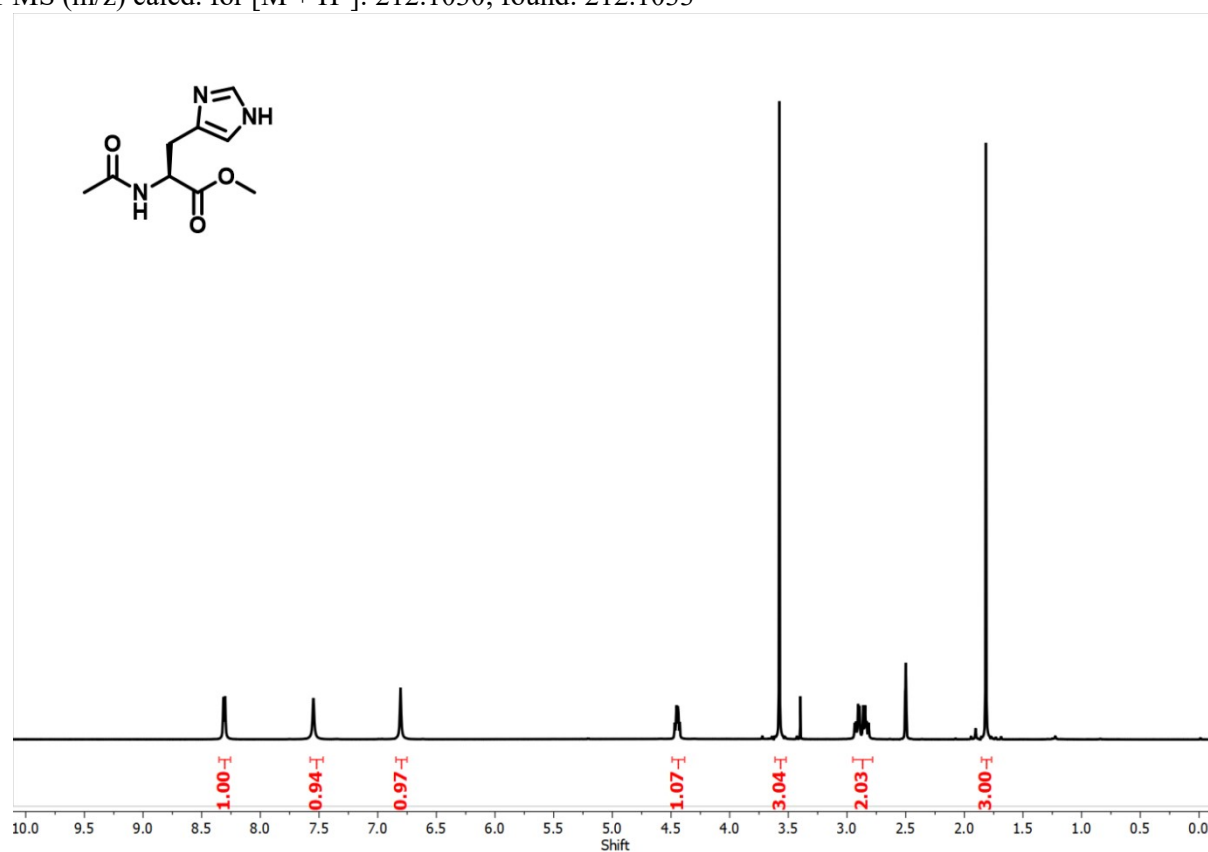

$^1\text{H}$  NMR of N-acetyl histidine methyl ester (AA)

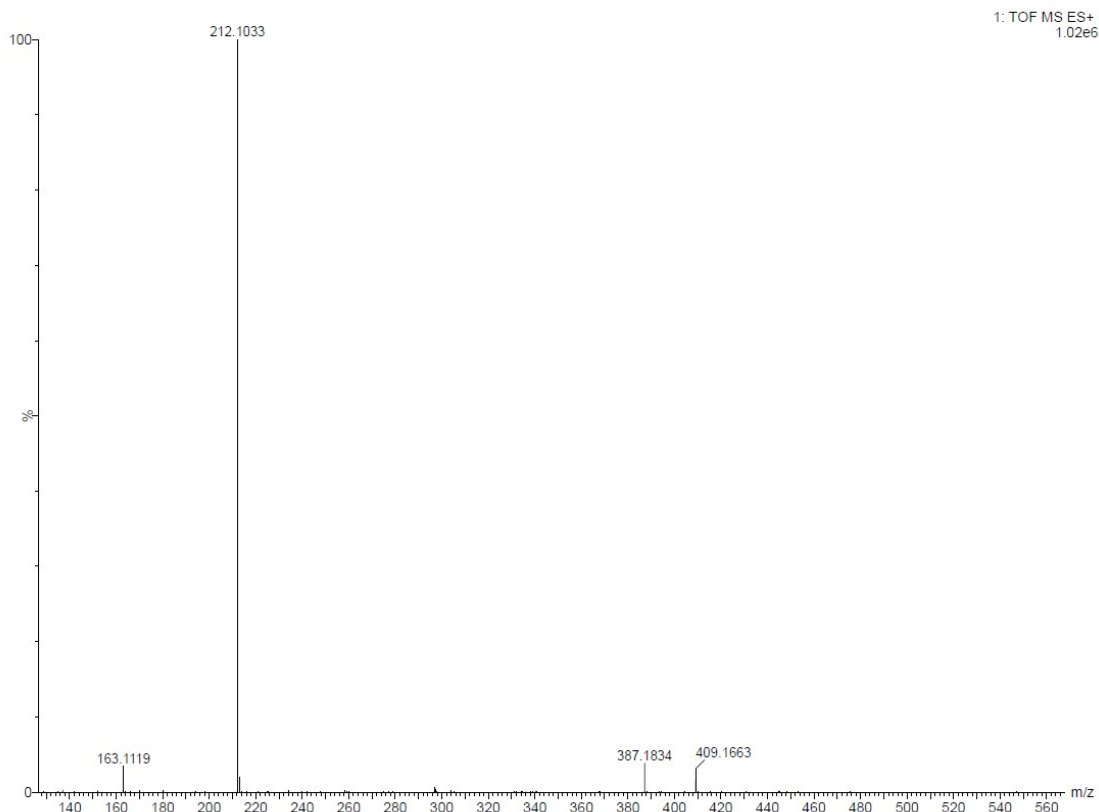

ESI-MS spectrum of **AA**

#### Synthesis and characterization of Pro-AR:

4-hydroxy-3-methoxybenzoic acid (**AR**, 1.0 g, 5.947 mmol) was taken along with 7 hydroxycoumarin (4.0 g, 23.6 mmol) in DCM. HBTU (13.53 g, 35.6 mmol) was added to the mixture which was kept for stirring under nitrogen atmosphere for 1 hour. Afterwards, triethylamine (4.96 ml, 35.58 mmol) was added and stirring was continued. The progress of the reaction was monitored with the help of thin layer chromatography. Upon completion of the reaction (~6 h), the solvent was removed in vacuo and ethyl acetate was added. The mixture was washed with brine and the organic layer was dried over Na<sub>2</sub>SO<sub>4</sub>. Column chromatography was performed with DCM as the eluent to obtain the pure product.

<sup>1</sup>H NMR (CDCl<sub>3</sub>, 500 MHz) δ (ppm): 3.99 (s, 3H), 6.14 (s, 1H), 6.41 (d, 1H), 7.02 (d, 1H), 7.17 (dd, 1H), 7.24 (d, 1H), 7.53 (d, 1H), 7.66 (d, 1H), 7.72 (d, 1H), 7.83 (dd, 1H).

ESI-MS (m/z) calcd. for [M + H<sup>+</sup>]: 313.0707; found: 313.0689

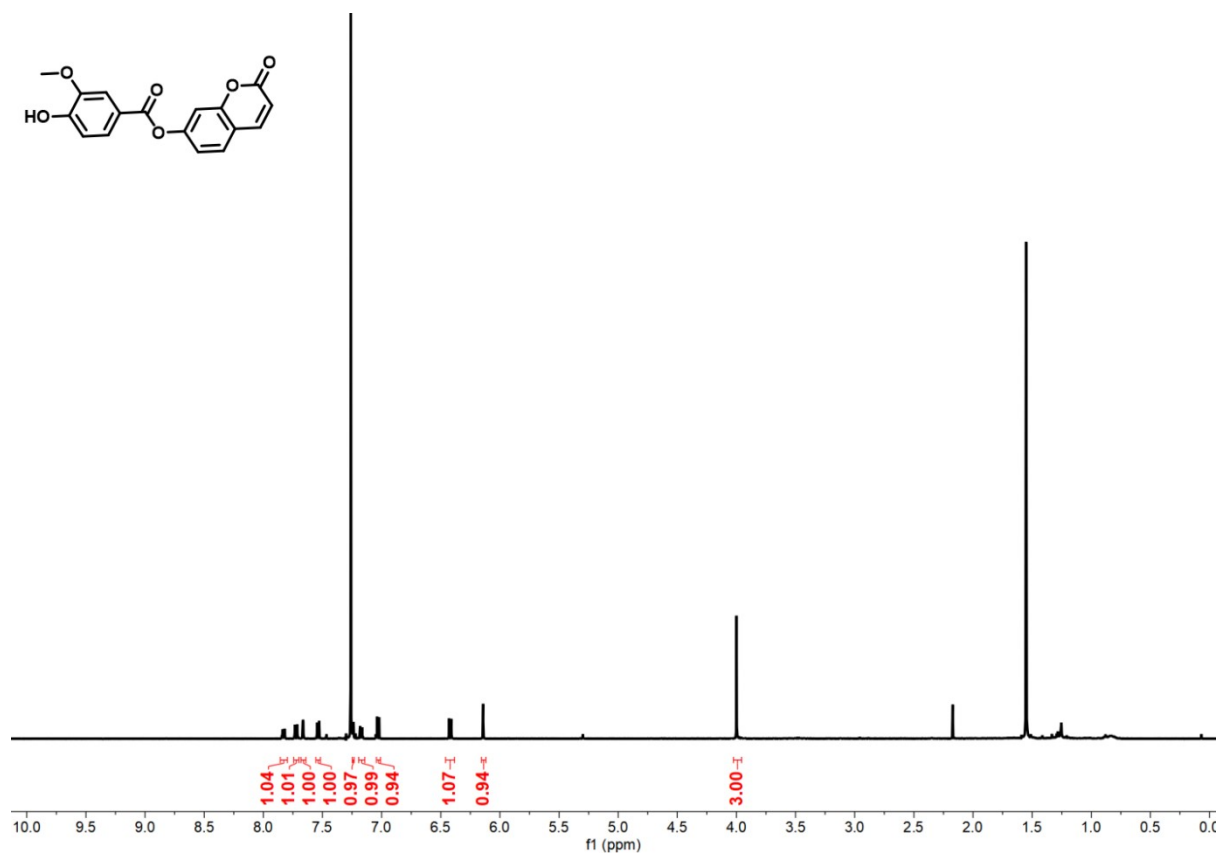

<sup>1</sup>H NMR spectrum of **Pro-AR**

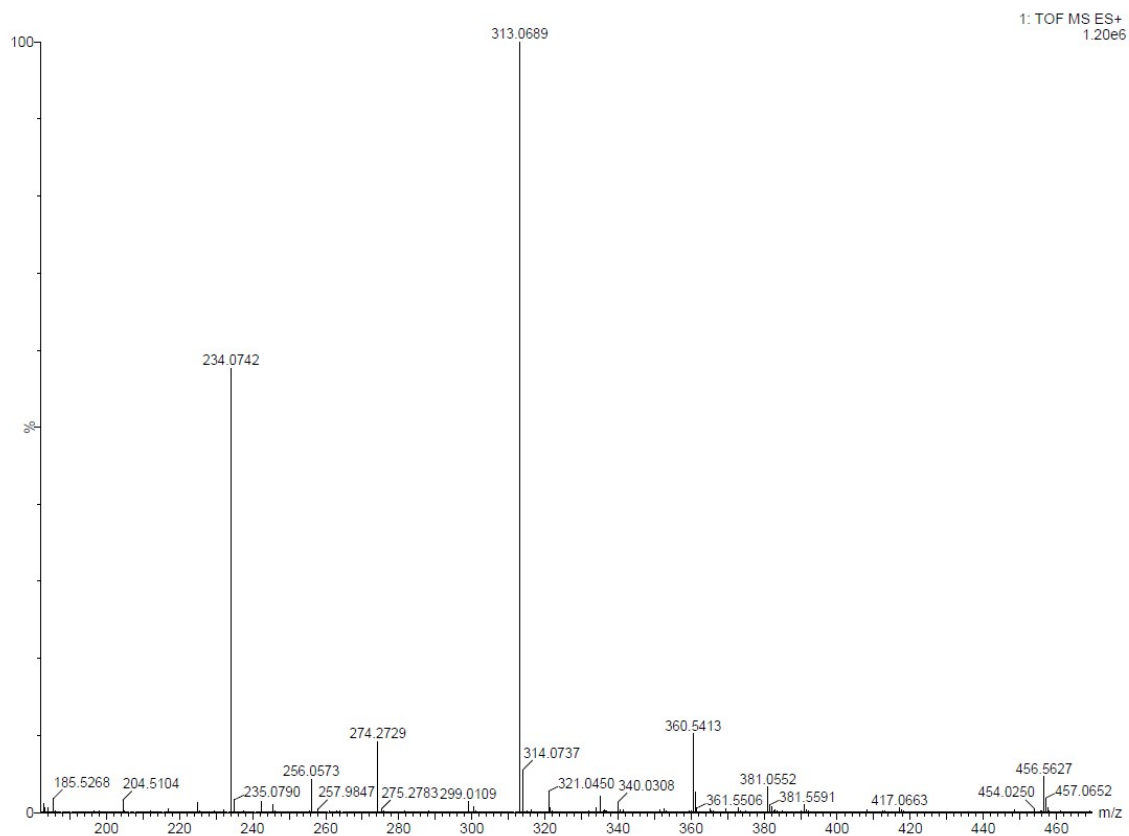

ESI-MS spectrum of **Pro-AR**

## Experimental methods

### Assembly Studies:

For gelation studies, **T** and **AR** were taken in a glass vial and required volume of H<sub>2</sub>O and H<sub>2</sub>O stock of **AA** (200mM) were added to the vial. The vials were heated to 80 °C to dissolve the compounds and afterwards, **Cf** (10mM, DMF stock) and H<sub>2</sub>O<sub>2</sub> (1M stock) were added immediately. Inversion of the vial indicated the formation of the gels, and the lifetimes of the gel state were noted. Final solvent composition of all the system was 98.5:1.5 H<sub>2</sub>O: DMF (v/v).

For the studies in presence of **Pro-AR**, required volume of **Pro-AR** (DMF stock, 800mM) of was added just after the addition of other components. Final solvent composition of the system was 97.25:2.75 H<sub>2</sub>O: DMF (v/v).

### NMR studies:

To characterize the synthesized compounds, all <sup>1</sup>H NMR spectra were recorded in Bruker (500 MHz) at 27 °C in respective solvents as mentioned in the synthesis and characterisation section.

NMR for binding of **AR** was carried out by preparing the gel in D<sub>2</sub>O with different concentrations of **AR** (while the concentrations of rest of the components were same) in presence of 1,1,2,2 tetrachloroethane as an internal standard.

The time dependent NMR spectra of the dissipative samples were recorded in presence of **T** (50mM), **AR** (50mM), **AA** (10mM), **Cf** (150μM) and H<sub>2</sub>O<sub>2</sub> (30mM) in D<sub>2</sub>O (in presence of 1.5% DMF) at different time. The internal standard 1,1,2,2 tetrachloroethane (50mM) was taken into a capillary tube inside the NMR tube. The NMR of the ternary mixture (**T+AR+AA**) were recorded using the above-mentioned procedure with the internal standard. The standard plot of **AA** was done using different concentrations of **AA** in D<sub>2</sub>O (in presence of 1.5% DMF) with internal standard. The peak area of **AA** was corrected with respect to standard following the peak at ~8.56 ppm.

### Electrospray Ionization Mass Spectrometry (ESI-MS):

Mass spectra of the synthesized compounds and the oxidised product were recorded in Waters Xevo G2-XS QToF.

### Transmission Electron Microscopy (TEM):

JEM-2100 plus microscopes were used to record the images. Samples were prepared by drop casting the diluted gel state or sol state on the TEM grid and allowing to adsorb for 60 s. Filter paper was used for wicking off excess solution and the samples were dried for few hours in vacuo at 4 °C before imaging.

### Atomic Force Microscopy:

The gel sample was diluted (25 times diluted with respect to **T** or **AR** concentration) in MiliQ water and directly drop casted onto a silicon wafer and allowed to adsorb for 1 min. The excess solution was wicked off with a blotting paper and then the sample was kept in desiccator. Standard tapping mode probes were used for imaging the sample under ambient conditions using Oxford MFD-3D Infinity AFM.

### Fluorescence:

Fluorescence spectra were recorded in Cary Agilent spectrofluorometer using a slit-width of 5 nm. For the time dependent fluorescence studies in presence of Rhodamine 110, 20 μM of dye was added to different vials containing the samples and were incubated for different times. Fluorescence spectra were recorded at different times from different vials. The samples were excited at 500 nm.

For monitoring the release of 7-hydroxy coumarin, the samples were excited at 330 nm.

### Powder X-ray diffraction:

A Rigaku SmartLab powder X-ray diffractometer having Cu Kα = 1.54 Å radiation was used to perform the XRD measurements. Samples as xerogel (gel of ca. 2 min age) were prepared by plunging in liquid nitrogen, followed by drying by the process of lyophilization. The dried samples were then mounted on glass slides. The scanning window was fixed up from 5-45°.

### UV Vis spectroscopy:

The UV-Vis measurements were carried out in Agilent Cary 3500 UV-Visible spectrophotometer. Samples were prepared using the same procedure as described before and were transferred to cells of 10 mm path length to perform the experiment.

#### **CD spectroscopy:**

CD spectra were recorded using a JASCO J-810 circular dichroism spectrometer fitted with a Peltier temperature controller to maintain the temperature of 25 °C. Gel samples were prepared (**T**=50 mM, **AR**=50 mM, **AA**=10 mM, **Cf**= 900 µM, H<sub>2</sub>O<sub>2</sub>=30 mM, final solvent composition was 98.5: 1.5 H<sub>2</sub>O: DMF (v/v)) and diluted immediately to place into a quartz cuvette with 10 mm path length. Each spectrum was obtained by scanning wavelength from 500 nm to 200 nm at a scanning rate of 500 nm/min. Two successive wavelength scans were taken to average for each sample. CD spectra were also recorded for different control systems in same solvent system. Since we measuring induced CD signal (negative) of hemin (**Cf**) in presence of assemblies, the concentration of **Cf** were kept high in every system (concentration of all other components were kept same).

#### **Rheology:**

MCR-102 rheometer from Anton Paar equipped with 25 mm cone plate (CP25-2, Anton Paar) geometry was used to characterize the viscoelastic behaviours at 25 °C. Strain sweep of the samples was performed by varying the strain from 0.01 % to 100 % at a fixed oscillatory frequency of 10 Hz and the linear viscoelastic regions (LVER) of the samples were determined. Mechanical strengths of the samples were determined from frequency sweep experiments carried out at a fixed strain of 0.1%. For the time dependent experiment, series of samples in vials were aged for different time intervals. Storage modulus (*G'*) of each incubated sample was measured at fixed strain of 0.1 % and fixed oscillatory frequency of 1 Hz. The storage moduli were plotted against time. For comparison of gel strengths, the *G'* corresponding to the frequency of 1 Hz has been taken from the frequency sweeps of the different samples.

#### **Confocal microscopy:**

Nile red dye (1 µL, 1 mM) was added to 9 µL of the diluted samples and incubated for 10 min. The solution was then cast on a glass slide and was enclosed with a cover glass and excited by 561 nm laser line at an emission bandwidth of 570-670 nm. Confocal images were recorded at Olympus Laser Scanning Confocal System Model FV3000 (part of the Atomic Force Microscope with Rheological Measurement and Confocal Imaging Unit facility, supported by Swarnajayanti (SB/SJF/2020-21/08).

#### **FTIR:**

Solid-state FT-IR study were done after forming the samples (gel and individual components in same solvent system) followed by lyophilization and measured with a PerkinElmer Spectrum RX1 spectrophotometer by following the KBr disk technique.

#### **HPLC:**

HPLC was carried out with Waters HPLC system equipped with 1525 binary pump and 2998 photodiode array detector. For monitoring the consumption of **AR**, Atlantis C18 5µm 4.6 × 250 mm analytical HPLC column was used.

The flow rate was maintained at 0.7 mL/min with a gradient elution method by using 0.1% TFA containing acetonitrile and water as the mobile phase.

#### **Oxidation of AR:**

To monitor the oxidation of **AR** with time, samples were prepared in different vials and were incubated for different times. Samples were diluted at respective time before injection. The chromatograms were extracted at 260 nm to observe the decrease of **AR** peak with time. Standard plot was done using different concentrations of **AR** and the amount of **AR** consumption was determined. 1,3,5-trimethoxy benzene was used as the internal standard.

For the characterisation of oxidation products using HRP enzyme, the flow rate was maintained at 0.7 mL/min with a gradient elution method by using 0.1% formic acid containing water and 0.1% TFA containing acetonitrile as the mobile phase.

#### **Hydrolysis of Pro-AR:**

The hydrolysis of **Pro-AR** was monitored at 324 nm to observe the generation of fluorophore 7-hydroxycoumarin. The standard plot was done using different concentrations of 7-hydroxycoumarin to determine the amount of hydrolysed product. The rate was calculated for initial 30 minutes.

#### Binding of **AA**:

For calculating the amount of **AA** that was getting bound to the assemblies, Spherisorb 5µm ODS1 4.6×250mm analytical HPLC column was used. The dissipative self-assembled samples **T** (50 mM), **AR** (50 mM), **AA** (10mM), **Cf** (150 µM) and H<sub>2</sub>O<sub>2</sub> (30 mM) incubated for different times were centrifuged and the supernatant was separated with the expectation that the supernatant will only have the unbound **AA**. The supernatant was injected in HPLC after dilution. The concentrations of the bound **AA** were calculated by subtracting the amount observed from HPLC at each time point from the total amount added i.e. 10mM. The chromatograms were extracted at 220 nm to find out the amount of **AA** present in the supernatant. Standard plot was done using different concentrations of **AA**.

#### Refuelling experiment:

Refuelling was done by adding 8.2 mM of **AR** after the mechanical strength showed a prominent decrease (~180 min). The system was heated for solubilization of the components and then set up for gelation and was followed by rheology measurements.

#### Computational study:

All computational calculations were done using the ORCA 5.0.3 quantum mechanical programme suite.<sup>2</sup> Unconstrained geometry optimizations were done employing the BP86<sup>3</sup> generalized gradient approximation (GGA) functional, along with D3BJ<sup>4</sup> empirical dispersion correction to precisely account for non-covalent interactions such as  $\pi$ - $\pi$  stacking and hydrogen bonding. A double- $\zeta$  quality split-valence def2-SVP basis set was applied to all atoms. The density-fitting resolution of identity (RI) approximation, paired with the auxiliary Coulomb-fitting basis set def2/J, was used to enhance computational efficiency. Tight convergence criteria (energy tolerance of  $1 \times 10^{-8}$  Hartree) were adhered for all self-consistent field (SCF) calculations. Finally, energies of the optimized geometries were refined with single-point calculations using the B3LYP-D3BJ<sup>5</sup> functional, augmented with empirical dispersion correction, and the double- $\zeta$  quality split-valence def2-SVP basis set on all atoms using CPCM<sup>6</sup> solvent model and water ( $\epsilon = 80.4$ , refractive index = 1.33) as solvent. Binding Energies (B.E.) were calculated using the following equation (i),

$$BE = \frac{Energy(higher\ conformer) - n * Energy(monomer)}{n} \dots\dots(i)$$



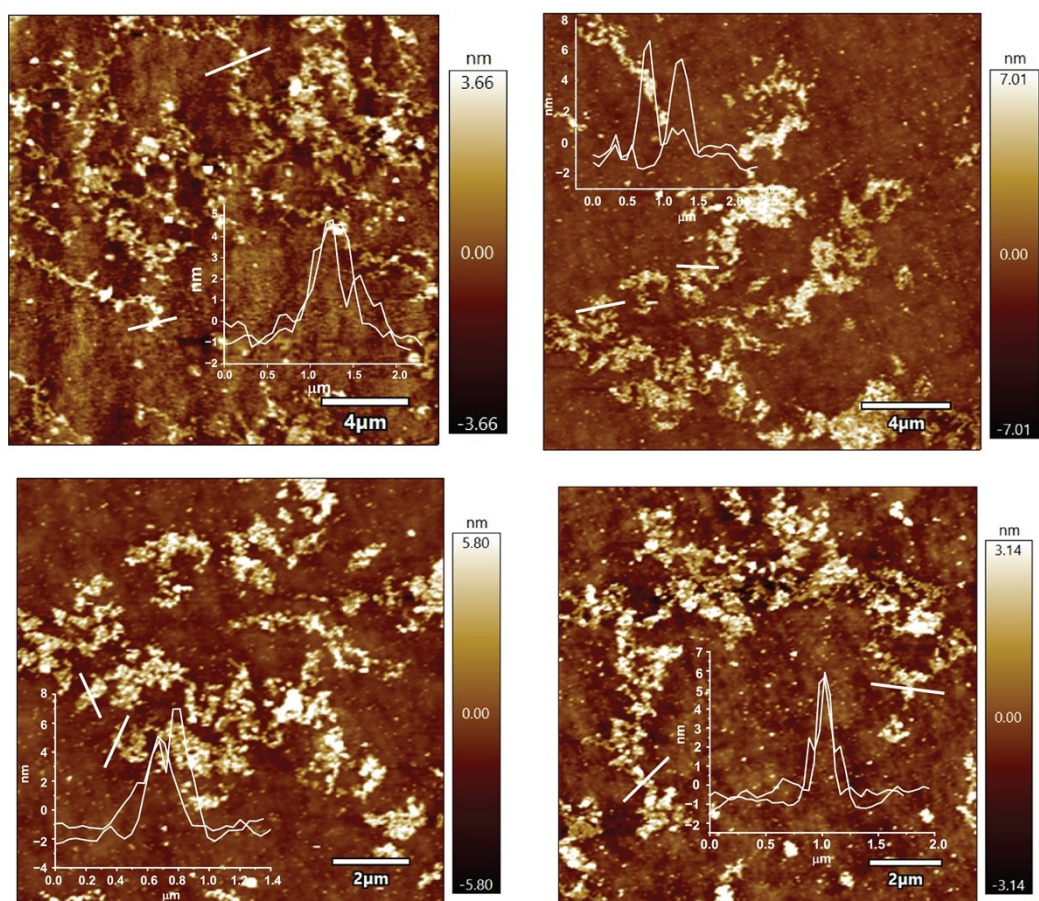

**Figure S1.** Representative AFM images and corresponding height profile of the diluted system containing T (50 mM), AR (50 mM), AA (10mM), Cf (150 μM) and H<sub>2</sub>O<sub>2</sub> (30 mM) at 10 min

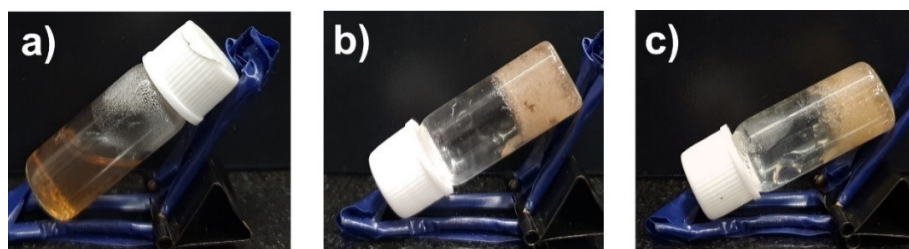

**Figure S2.** Representative vial images of a system containing **T** (50 mM), **AR** (50 mM), **Cf** (150  $\mu$ M) and  $\text{H}_2\text{O}_2$  (30 mM) at (a)  $\approx 0$  min, (b) 2 min and (c) 12 h, final solvent composition was 98.5: 1.5  $\text{H}_2\text{O}$ : DMF (v/v).

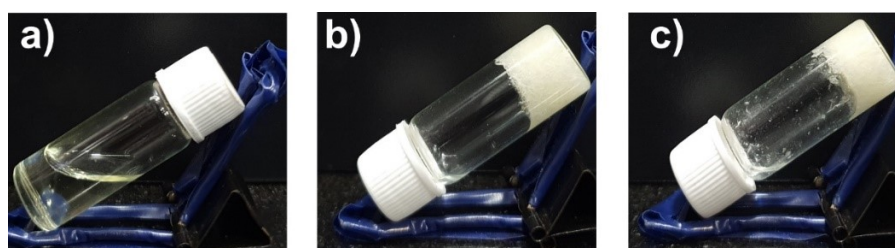

**Figure S3.** Representative vial images of the sample containing **T** (50 mM), **AR** (50 mM), **AA** (10 mM) and  $\text{H}_2\text{O}_2$  (30 mM) at (a)  $\approx 0$  min, (b) 2 min and (c) 12 h, final solvent composition was 98.5: 1.5  $\text{H}_2\text{O}$ : DMF (v/v).

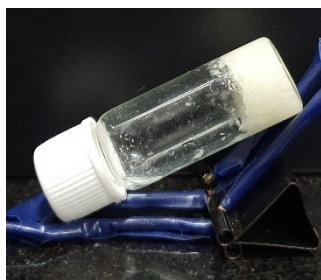

**Figure S4.** Representative vial image of a sample containing **T** (50 mM) and **AR** (50 mM) after 12h, final solvent composition was 98.5:1.5 H<sub>2</sub>O: DMF (v/v).

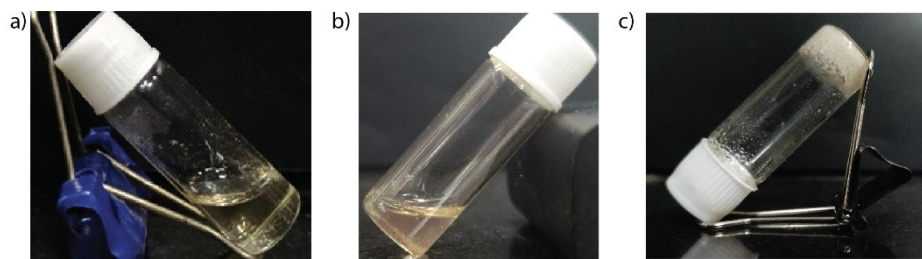

**Figure S5.** Representative vial images of a sample containing a) **T** (50 mM), **AA** (10 mM), **Cf** (150  $\mu$ M) and  $\text{H}_2\text{O}_2$  (30 mM) at 30min and b) **AR** (50 mM), **AA** (10 mM), **Cf** (150  $\mu$ M) and  $\text{H}_2\text{O}_2$  (30 mM) at 30min, c) **T** (50 mM), **AR** (50 mM), **AA** (10 mM), **Cf** (150  $\mu$ M) at 6h; final solvent composition was 98.5:1.5  $\text{H}_2\text{O}$ : DMF (v/v).

|                                                 |                                                                                                                                     |                |              |              |                                |             |                                |                |                |              |
|-------------------------------------------------|-------------------------------------------------------------------------------------------------------------------------------------|----------------|--------------|--------------|--------------------------------|-------------|--------------------------------|----------------|----------------|--------------|
| Concentration variation of different components | <b>T</b>                                                                                                                            | 10mM           | 50mM         | 70mM         | 50mM                           | 50mM        | 50mM                           | 50mM           | 50mM           | 50mM         |
|                                                 | <b>AR</b>                                                                                                                           | 50mM           | 50mM         | 50mM         | 50mM                           | 50mM        | 50mM                           | 50mM           | 10mM           | 70mM         |
|                                                 | <b>AA</b>                                                                                                                           | 10mM           | 10mM         | 10mM         | 1mM                            | 20mM        | 10mM                           | 10mM           | 10mM           | 10mM         |
|                                                 | <b>Cf</b>                                                                                                                           | 150 $\mu$ M    | 150 $\mu$ M  | 150 $\mu$ M  | 150 $\mu$ M                    | 150 $\mu$ M | 10 $\mu$ M                     | 300 $\mu$ M    | 150 $\mu$ M    | 150 $\mu$ M  |
|                                                 | $\text{H}_2\text{O}_2$                                                                                                              | 30mM           | 30mM         | 30mM         | 30mM                           | 30mM        | 30mM                           | 30mM           | 30mM           | 30mM         |
| Lifetime (min)                                  |                                                                                                                                     | No aggregation | 150 $\pm$ 15 | 360 $\pm$ 40 | Kinetically stable co-assembly | 60 $\pm$ 6  | Kinetically stable co-assembly | 90 $\pm$ 12    | No aggregation | 240 $\pm$ 60 |
|                                                 |                                                                                                                                     |                |              |              |                                |             |                                |                |                |              |
| pH variation                                    | Concentration of components <b>T</b> (50mM) <b>AR</b> (50mM) <b>AA</b> (10mM) <b>Cf</b> (150 $\mu$ M) $\text{H}_2\text{O}_2$ (30mM) |                |              |              |                                |             |                                |                |                |              |
|                                                 | Lifetime (min)                                                                                                                      | pH=2           |              |              | pH=5                           |             |                                | pH $\geq$ 7    |                |              |
|                                                 |                                                                                                                                     | 210 $\pm$ 80   |              |              | 150 $\pm$ 15                   |             |                                | No aggregation |                |              |

**Figure S6.** Behavior of the co-assembled systems having varying concentrations of **T**, **AR**, **AA** and **Cf** and at varying pH.

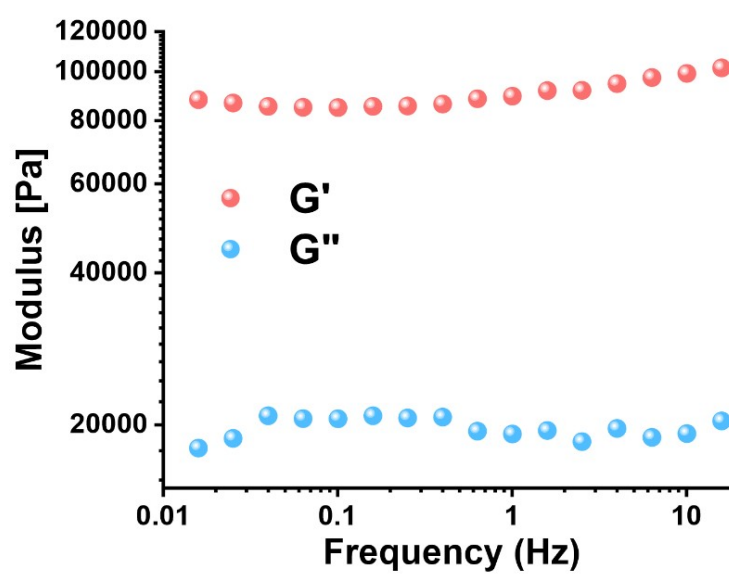

**Figure S7.** Frequency sweep of the dissipative self-assembled gel containing **T** (50 mM), **AR** (50 mM), **AA** (10 mM), **Cf** (150  $\mu$ M) and  $\text{H}_2\text{O}_2$  (30 mM) at  $t=2$  min.

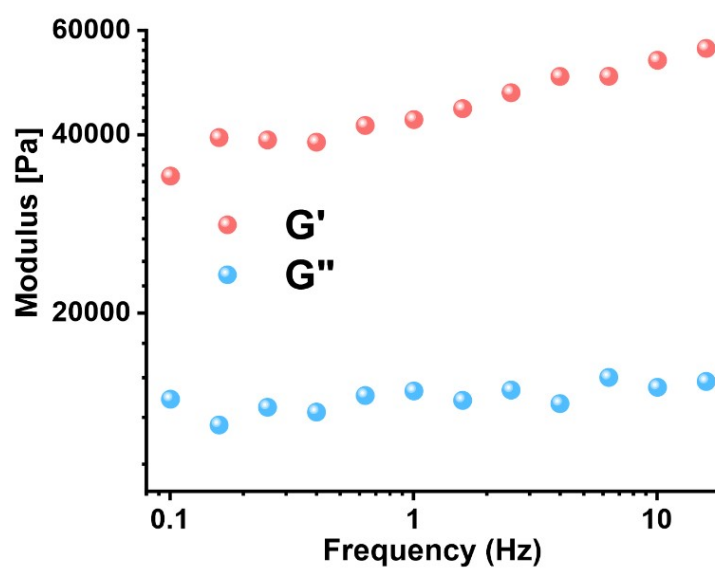

**Figure S8.** Frequency sweep of the gel containing **T** (50 mM), **AR** (50 mM), **AA** (10 mM) and  $\text{H}_2\text{O}_2$  (30 mM) at  $t = 10$  min.

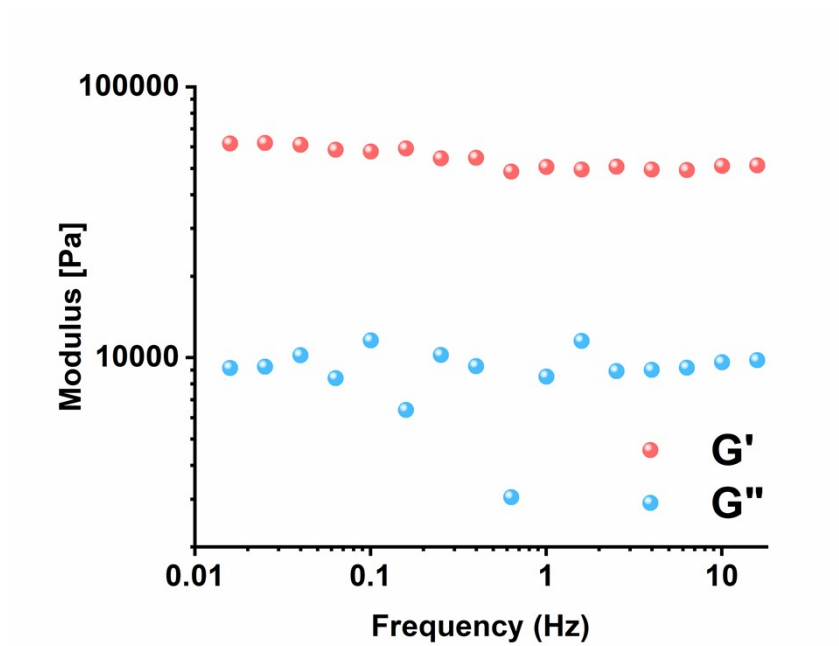

**Figure S9.** Frequency sweep of the gel containing **T** (50 mM), **AR** (50 mM), **Cf** (150  $\mu$ M) and  $\text{H}_2\text{O}_2$  (30 mM) at  $t = 2$  min.



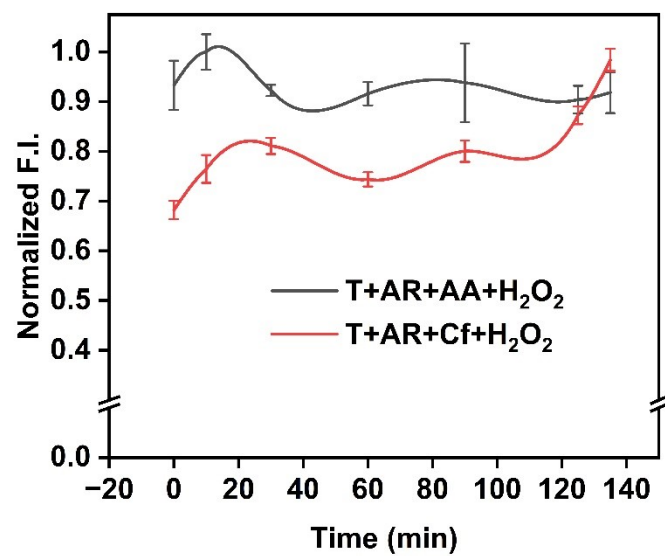

**Figure S10:** Time dependent fluorescence intensities of Rhodamine 110 in different systems.

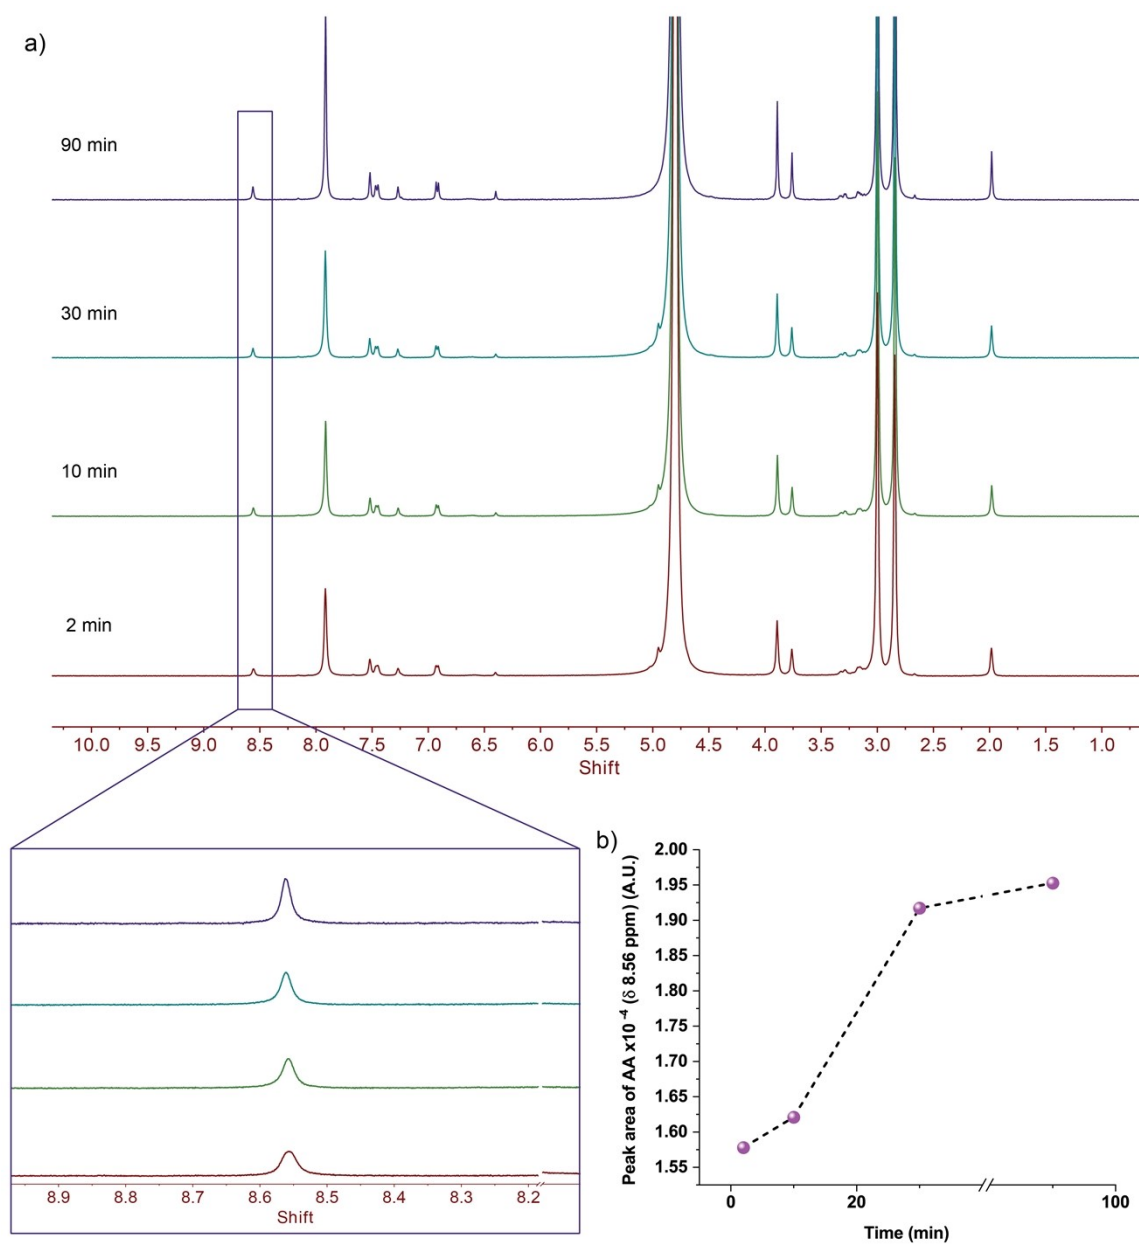

**Figure S11:** a) Time dependent  $^1\text{H}$ -NMR spectra of the dissipative self-assembled system ( $\text{T}+\text{AR}+\text{AA}+\text{Cf}+\text{H}_2\text{O}_2$ ). b) Peak area of the 8.56 ppm peak of AA (shown as zoomed) with time.

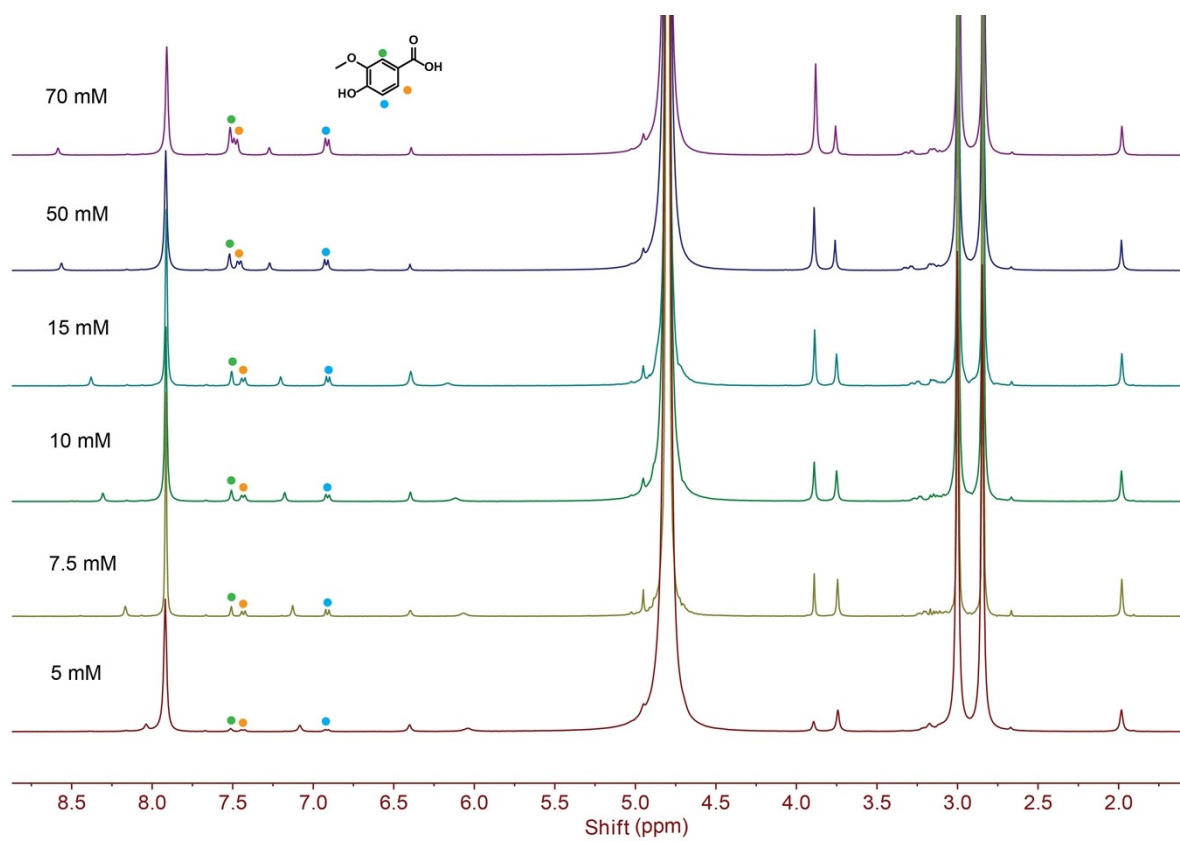

**Figure S12:**  $^1\text{H}$ -NMR spectra at age of 10 min of the co-assembled system (**T**+**AR**+**AA**+**Cf**+ $\text{H}_2\text{O}_2$ ) with different concentrations of **AR**.

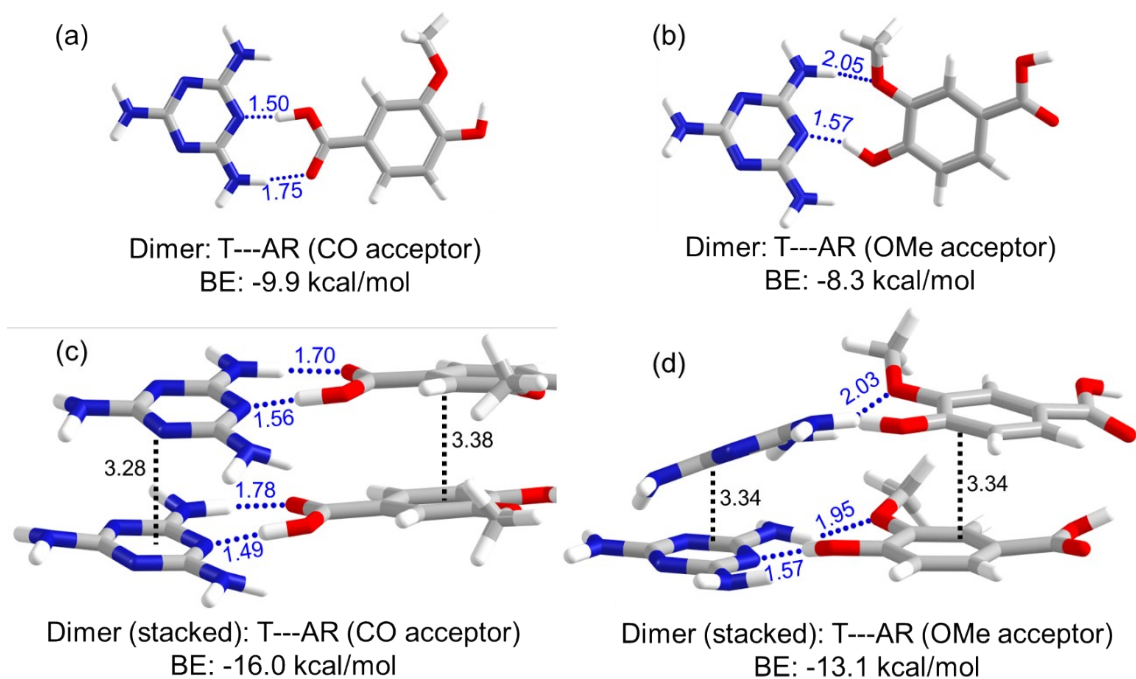

**Figure S13.** Optimized geometries of computational models with different interaction modes between **T** and **AR**: (a) dimer with CO as H-bond acceptor, (b) dimer with OMe as H-bond acceptor, (c) parallel stacked-dimer with CO as H-bond acceptor and (d) parallel stacked-dimer with OMe as H-bond acceptor. Distances shown are in units of Å; blue colored: H-bond, black colored:  $\pi$ - $\pi$  stacking distance.

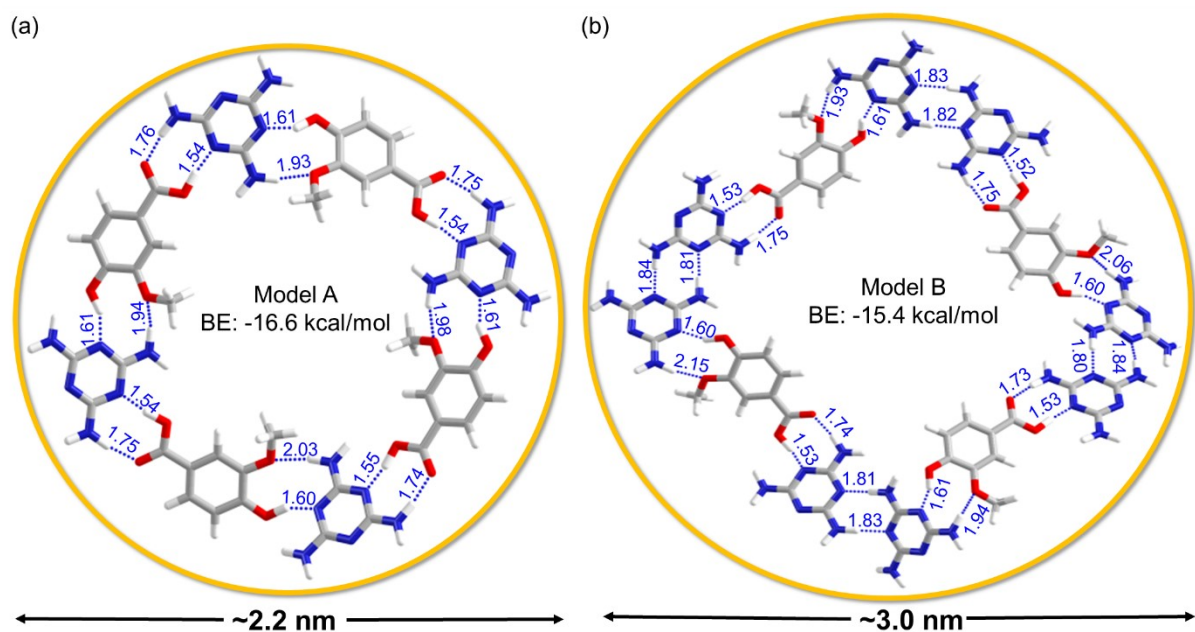

**Figure S14.** Proposed cyclic rosette geometries: (a) Model A and (b) Model B for **T** and **AR** assembly guided through H-bond networks and its calculated diameter. Energetically, Model A is preferred over Model B and preferably leads to self-assembled structures.

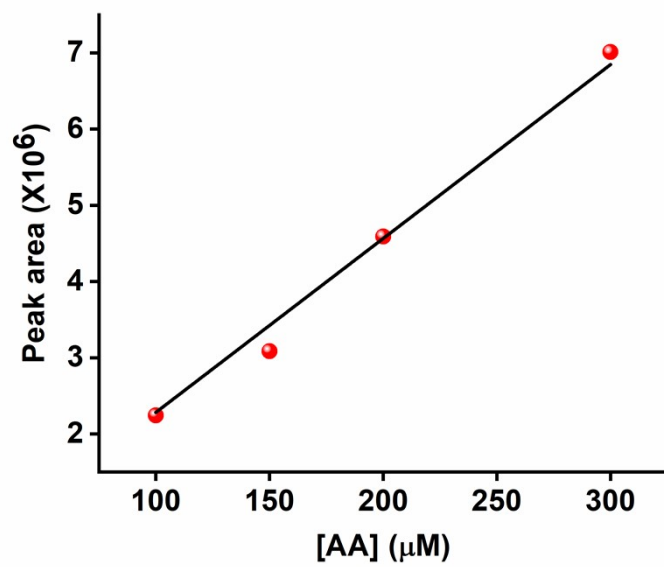

**Figure S15:** Standard plot of AA ( $\lambda=220$  nm) obtained from HPLC.

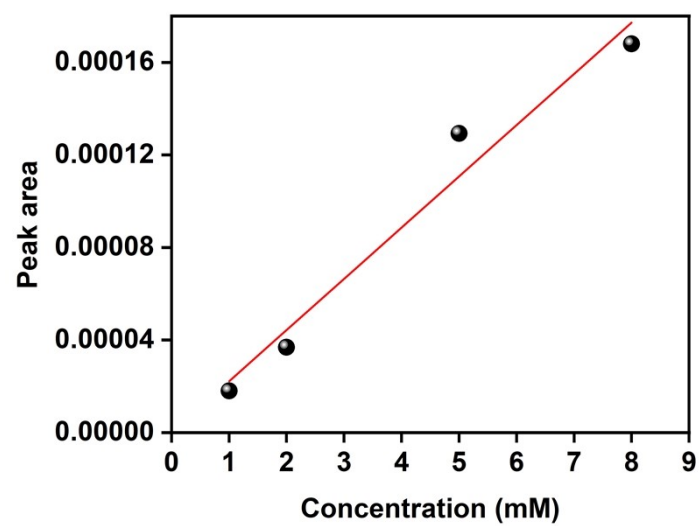

**Figure S16:** Standard plot of AA obtained from  $^1\text{H}$ -NMR.

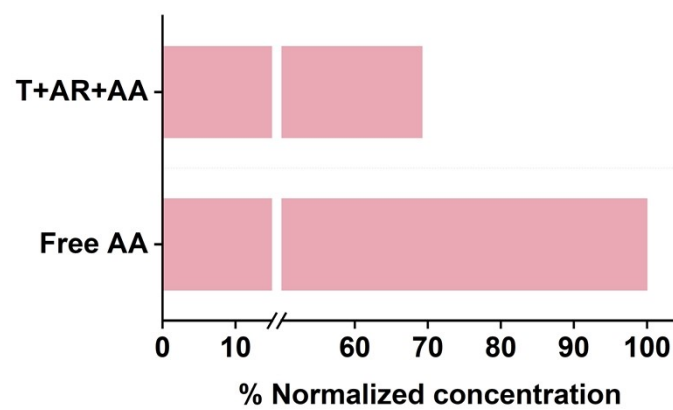

**Figure S17:** % concentration decrease of AA obtained from  $^1\text{H}$ -NMR.



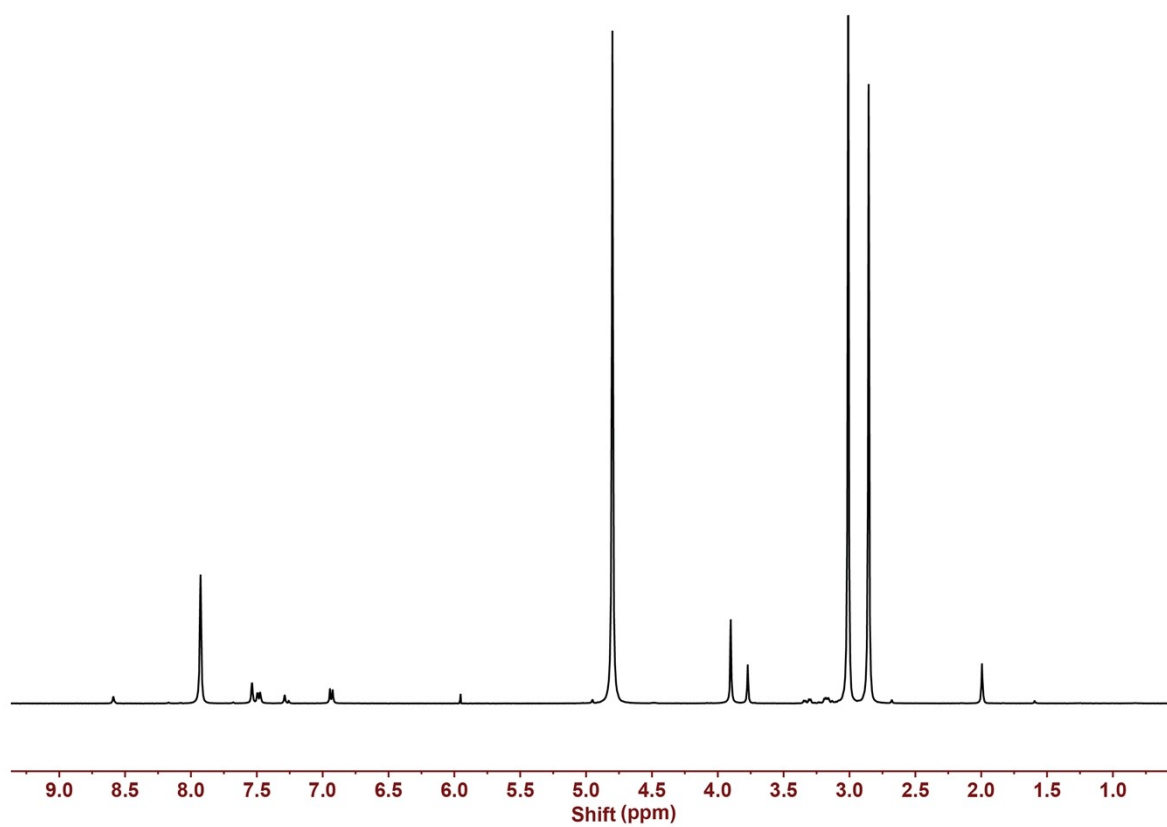

**Figure S18:** Representative  $^1\text{H}$ -NMR spectra of **T+AR+AA** in  $\text{D}_2\text{O}$  (in presence of 1.5% DMF).

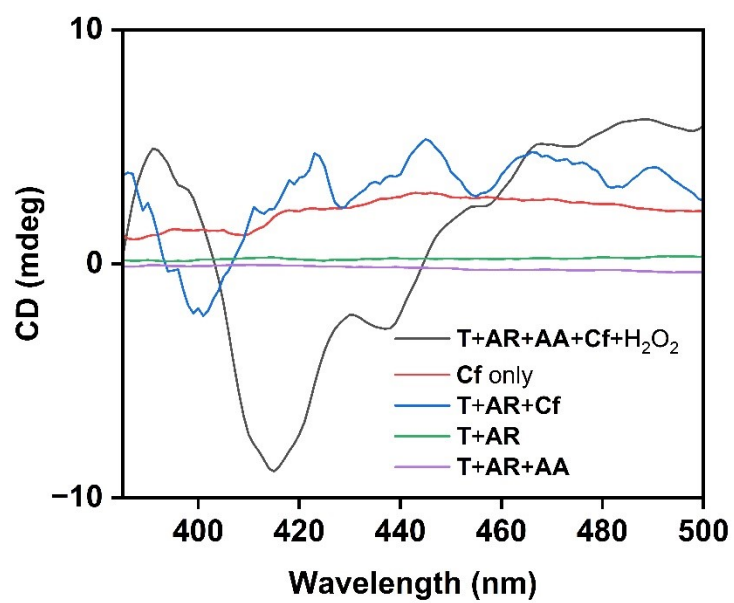

**Figure S19:** CD spectra of different systems ( $[T]=50$  mM,  $[AR]=50$  mM,  $[AA]=10$  mM,  $[Cf]=900$   $\mu$ M,  $[H_2O_2]$  =30 mM).

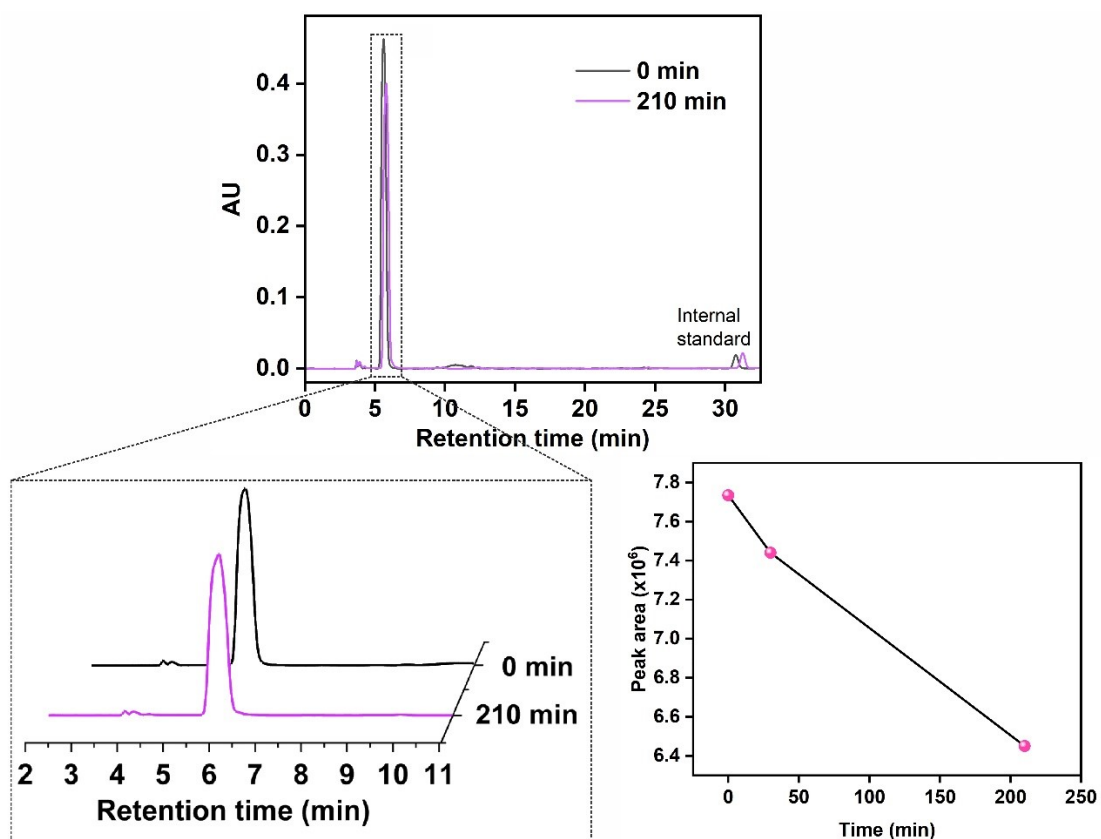

**Figure S20:** Full HPLC chromatogram and the peak area decrease showing the consumption of **AR** with time.

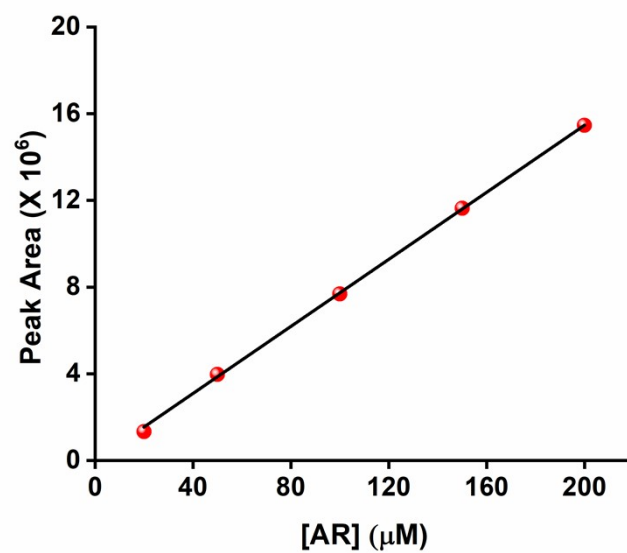

**Figure S21.** Standard plot of **AR** ( $\lambda=260$  nm) obtained from HPLC.

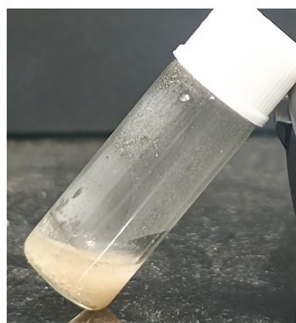

**Figure S22.** Representative vial image of a sample containing **T** (50 mM), **AR** (41.8 mM) **AA** (10 mM), **Cf** (150 μM) and  $\text{H}_2\text{O}_2$  (30 mM) at 10min

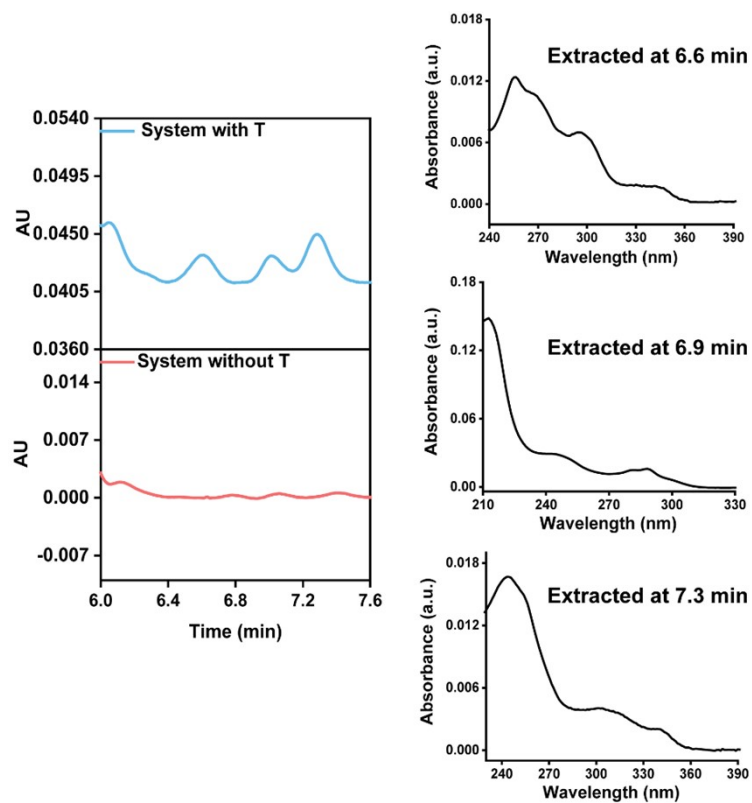

**Figure S23.** HPLC chromatograms ( $\lambda=254$  nm) of the samples in presence and absence of **T** after 3.5 h and the UV-Vis spectra of the different peaks generated in presence of **T**. (Solvent system: 0.1% TFA containing acetonitrile-water)

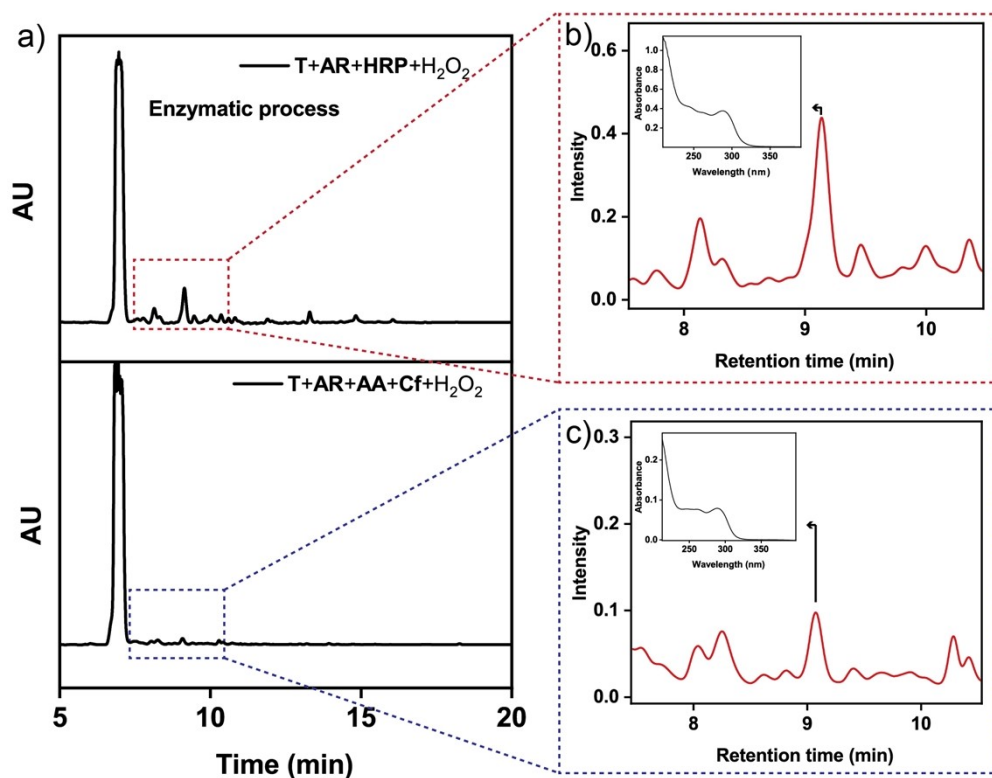

**Figure S24.** a) Full HPLC chromatograms ( $\lambda = 254$  nm) and corresponding UV-Vis spectra (inset) of the oxidation products of **AR** in zoomed images (b) in presence of horseradish peroxidase (HRP, 50  $\mu$ M) and H<sub>2</sub>O<sub>2</sub> (30 mM) and (c) co-assembled system (T+AR+AA+Cf+H<sub>2</sub>O<sub>2</sub>) (Solvent system: 0.1% formic acid containing water-0.1% TFA containing acetonitrile).

DD23-Jul-2024 17:06:50  
DD-SPAGEL-VE 3 (0.087) AM (Cen,4, 80.00, Ar,10000.0,0.00,0.00)

IISER - KOLKATA

1: TOF MS ES-  
2.36e6

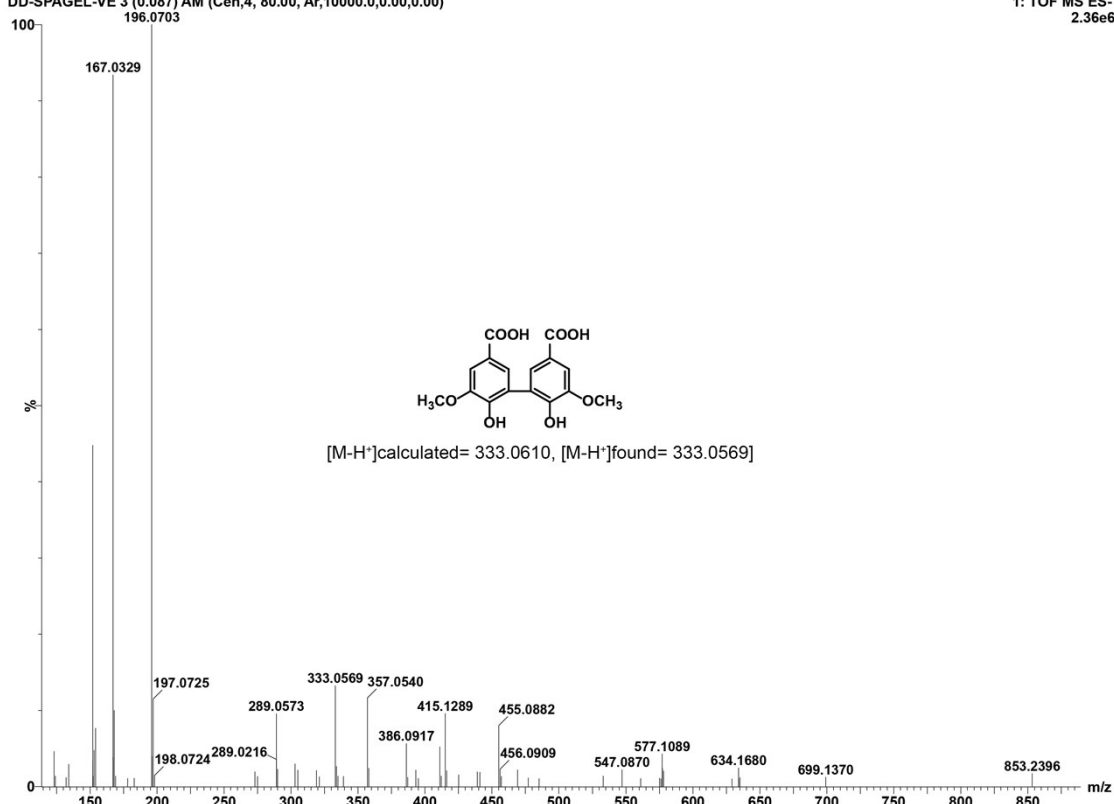

**Figure S25:** HRMS spectrum of the dissipative system (T+AR+AA+Cf+H<sub>2</sub>O<sub>2</sub>).

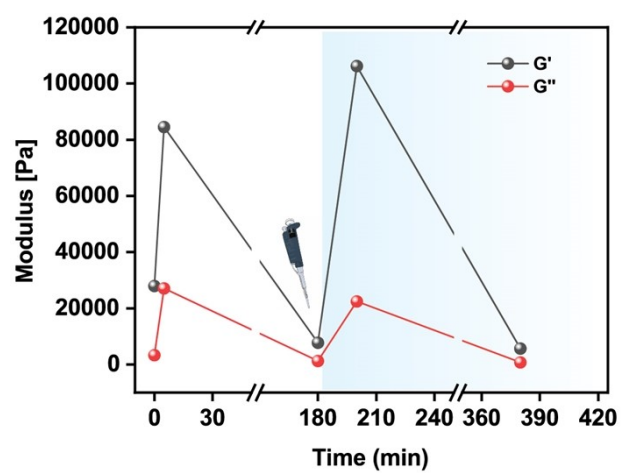

**Figure S26.** Rheology showing an additional cycle of dissipative (dis)assembly fueled by addition of **AR** after the first cycle.



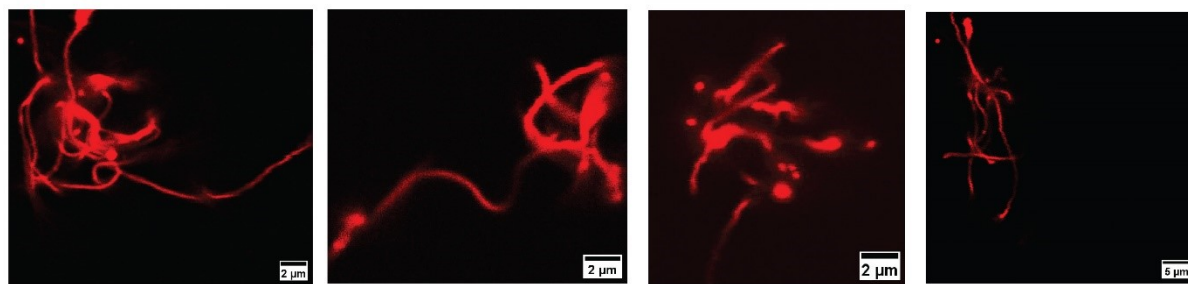

**Figure S27.** Representative CLSM images of the dissipative assemblies at  $t=2$  min incubated with Nile red.

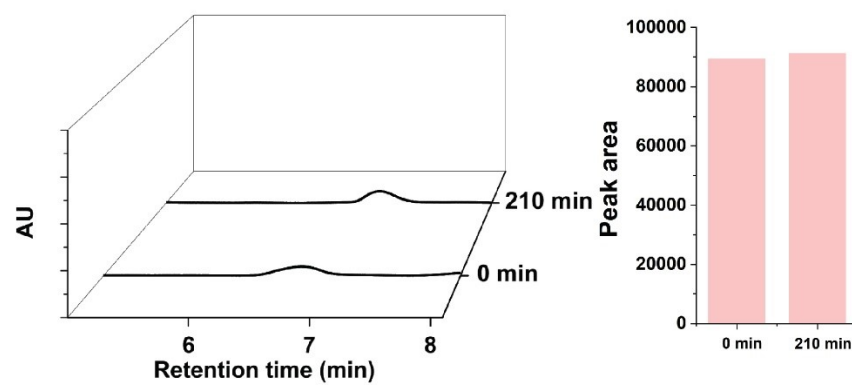

**Figure S28:** HPLC chromatograms showing negligible generation of 7-hydroxycoumarin from **Pro-AR** at pH 5.32.

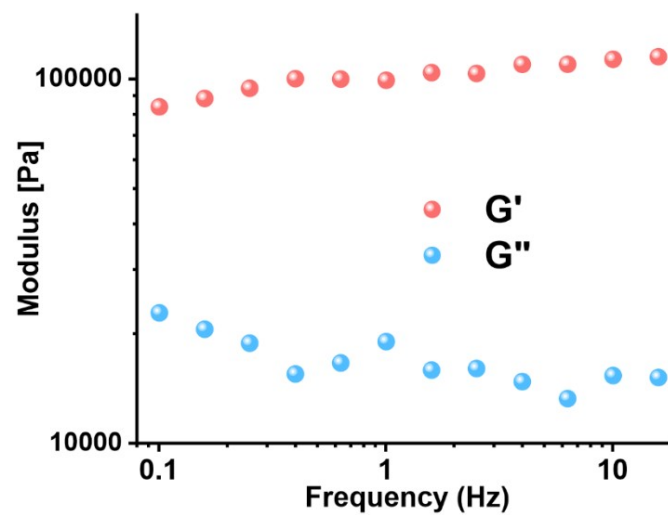

**Figure S29.** Frequency sweep of the gel containing **T** (50 mM), **AR** (50 mM), **AA** (10 mM), **Cf** (150  $\mu$ M),  $\text{H}_2\text{O}_2$  (30 mM) and **Pro-AR** (10 mM) at  $t=2$  min.

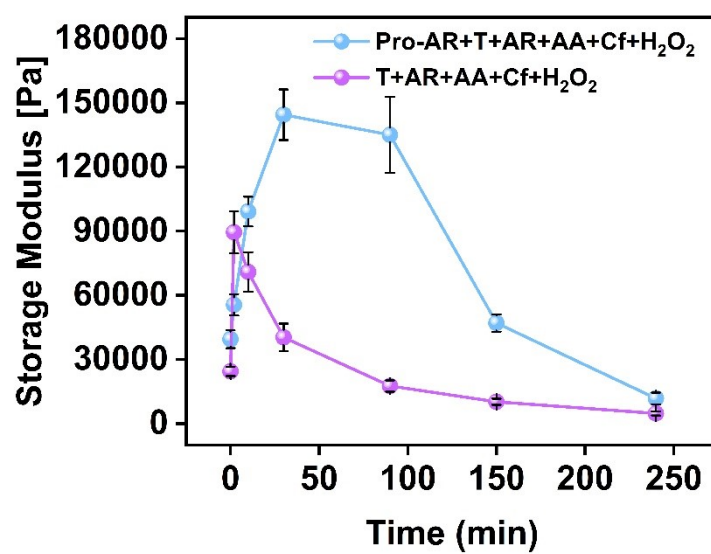

**Figure S30.** Time dependent changes of storage modulus in the dissipative self-assembled systems in the presence and absence of **Pro-AR**.

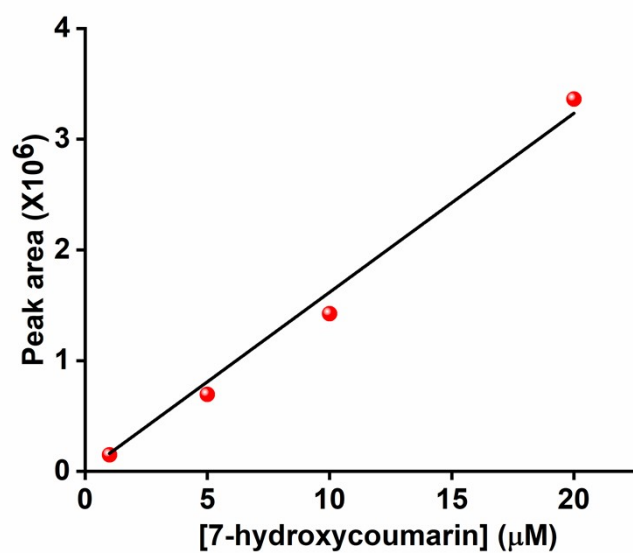

**Figure S31.** Standard plot ( $\lambda=324$  nm) of 7-hydroxycoumarin obtained from HPLC.

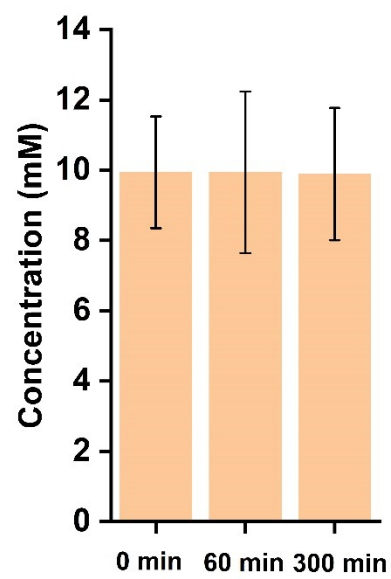

**Figure S32.** Bar diagram of concentration of **AA** in the system (**T+AR+AA+Cf+H<sub>2</sub>O<sub>2</sub>**) with time.

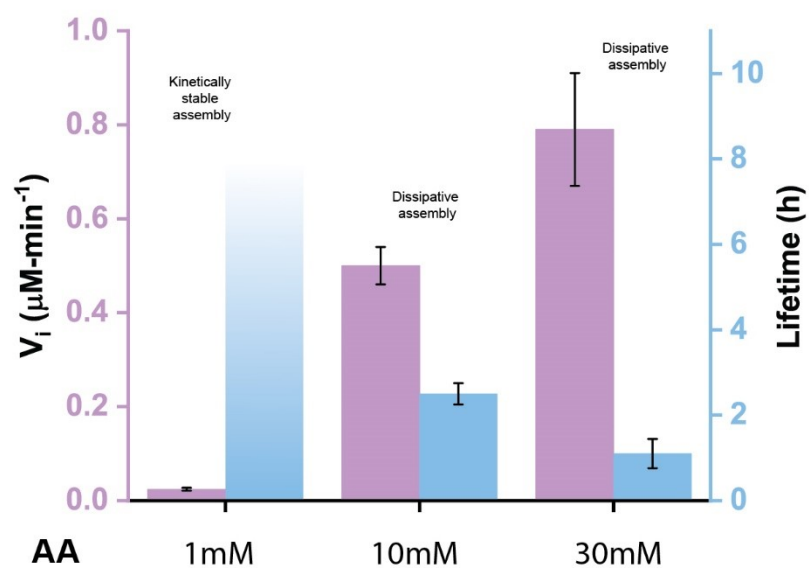

**Figure S33.** Bar diagram of rate of hydrolysis of **Pro-AR** with different concentrations of **AA** (**T**=50 mM, **AR**=50 mM, **Cf**=150  $\mu\text{M}$ ,  $\text{H}_2\text{O}_2$ =30 mM). The kinetically stable co-assembly shown with a fading bar implies a lifetime of more than 48 h.

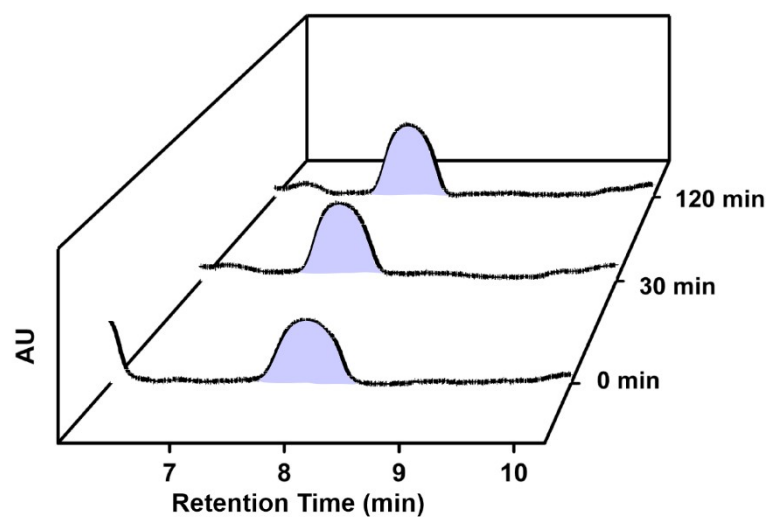

**Figure S34.** HPLC chromatograms showing the release of 7-hydroxycoumarin due to the hydrolysis of **Pro-AR** (10 mM) in presence of **AA** (10 mM), **AR** (50 mM), **Cf** (150  $\mu$ M) and  $\text{H}_2\text{O}_2$  (30 mM) in absence of **T** (**AA+AR+Cf+Pro-AR+H<sub>2</sub>O<sub>2</sub>**, no assemblies).



**XYZ coordinates of optimized geometries:**

|                           |              |              |              |                                    |               |              |              |
|---------------------------|--------------|--------------|--------------|------------------------------------|---------------|--------------|--------------|
| <b>T (triazine amine)</b> |              |              |              | C                                  | -0.220159000  | 1.350631000  | 4.787285000  |
| N                         | 0.007015000  | 0.003081000  | -0.018862000 | O                                  | -0.306625000  | 1.960418000  | 5.996772000  |
| H                         | -0.455577000 | 0.760117000  | -0.515383000 | H                                  | -0.460177000  | 2.912701000  | 5.846852000  |
| H                         | 0.472396000  | -0.753081000 | -0.514111000 | C                                  | 0.005924000   | -0.060385000 | 4.788143000  |
| C                         | 0.003392000  | 0.001646000  | 1.343376000  | O                                  | 0.109751000   | -0.634834000 | 6.016559000  |
| N                         | 0.631796000  | -1.026155000 | 1.953746000  | C                                  | 0.339325000   | -2.032021000 | 6.072550000  |
| C                         | 0.589445000  | -0.964587000 | 3.302185000  | H                                  | 1.297043000   | -2.313004000 | 5.579070000  |
| N                         | 1.204625000  | -1.971053000 | 3.983543000  | H                                  | -0.487347000  | -2.606097000 | 5.596313000  |
| H                         | 1.663159000  | -2.714463000 | 3.463269000  | H                                  | 0.392974000   | -2.296560000 | 7.144616000  |
| H                         | 1.194694000  | -1.959800000 | 5.000121000  | C                                  | 0.079995000   | -0.730573000 | 1.031489000  |
| N                         | -0.003760000 | -0.001722000 | 4.040076000  | O                                  | -0.013921000  | -0.191515000 | -0.061349000 |
| C                         | -0.593405000 | 0.962827000  | 3.301392000  | O                                  | 0.294447000   | -2.075059000 | 1.155417000  |
| N                         | -0.628302000 | 1.027734000  | 1.952991000  | H                                  | 0.340291000   | -2.407298000 | 0.233165000  |
| N                         | -1.211382000 | 1.968088000  | 3.981959000  | <b>Dimer: T---AR (CO acceptor)</b> |               |              |              |
| H                         | -1.667107000 | 2.712566000  | 3.460708000  | C                                  | -7.525850000  | 9.405421000  | 29.775336000 |
| H                         | -1.206987000 | 1.954802000  | 4.998539000  | N                                  | -8.478740000  | 9.279166000  | 28.829006000 |
| <b>AR</b>                 |              |              |              | C                                  | -9.740188000  | 9.224569000  | 29.301455000 |
| C                         | -0.019740000 | -0.038563000 | 2.341274000  | N                                  | -10.735321000 | 9.095443000  | 28.384638000 |
| C                         | 0.103215000  | -0.738205000 | 3.566438000  | H                                  | -10.497836000 | 9.068966000  | 27.395999000 |
| H                         | 0.276488000  | -1.820381000 | 3.537643000  | H                                  | -11.701868000 | 9.072015000  | 28.700044000 |
| C                         | -0.241749000 | 1.349395000  | 2.345882000  | N                                  | -10.120365000 | 9.280692000  | 30.601271000 |
| H                         | -0.334065000 | 1.874780000  | 1.385102000  | C                                  | -9.098686000  | 9.409300000  | 31.461996000 |
| C                         | -0.340436000 | 2.033232000  | 3.564581000  | N                                  | -7.790300000  | 9.479051000  | 31.114683000 |
| H                         | -0.514717000 | 3.122109000  | 3.579003000  | N                                  | -9.388436000  | 9.482753000  | 32.788984000 |

|                                     |               |              |              |   |               |              |              |
|-------------------------------------|---------------|--------------|--------------|---|---------------|--------------|--------------|
| H                                   | -8.637224000  | 9.526606000  | 33.475553000 | C | -3.366906000  | 11.596324000 | 22.785845000 |
| H                                   | -10.358634000 | 9.387110000  | 33.078944000 | C | -4.656318000  | 11.424033000 | 22.228882000 |
| N                                   | -6.235416000  | 9.465115000  | 29.404103000 | H | -4.766811000  | 11.464226000 | 21.138385000 |
| H                                   | -5.486347000  | 9.535332000  | 30.129661000 | C | -3.205510000  | 11.539975000 | 24.184598000 |
| H                                   | -6.031235000  | 9.397227000  | 28.409148000 | H | -2.197468000  | 11.674218000 | 24.602318000 |
| C                                   | -3.869045000  | 9.805713000  | 33.839565000 | C | -4.310890000  | 11.326399000 | 25.010428000 |
| C                                   | -4.331033000  | 9.924343000  | 35.172877000 | H | -4.207430000  | 11.288601000 | 26.104892000 |
| H                                   | -5.412873000  | 9.942646000  | 35.353749000 | C | -5.610214000  | 11.163925000 | 24.477052000 |
| C                                   | -2.486479000  | 9.781843000  | 33.576729000 | O | -6.635137000  | 10.975600000 | 25.314590000 |
| H                                   | -2.158773000  | 9.689670000  | 32.531656000 | H | -7.599498000  | 10.993805000 | 24.896677000 |
| C                                   | -1.558473000  | 9.874100000  | 34.623285000 | C | -5.761783000  | 11.201423000 | 23.054379000 |
| H                                   | -0.474936000  | 9.856940000  | 34.436929000 | O | -7.044725000  | 11.013204000 | 22.585009000 |
| C                                   | -2.007794000  | 9.992095000  | 35.947478000 | C | -2.175074000  | 11.836798000 | 21.940852000 |
| O                                   | -1.136149000  | 10.083928000 | 36.980829000 | O | -1.032741000  | 11.990026000 | 22.350042000 |
| H                                   | -1.689081000  | 10.155211000 | 37.790050000 | O | -2.467158000  | 11.875057000 | 20.602832000 |
| C                                   | -3.407175000  | 10.016448000 | 36.214514000 | H | -1.603106000  | 12.037045000 | 20.167119000 |
| O                                   | -3.696777000  | 10.135136000 | 37.553908000 | C | -7.319902000  | 11.402358000 | 21.246320000 |
| C                                   | -4.828778000  | 9.705853000  | 32.700825000 | H | -7.017870000  | 12.456910000 | 21.065759000 |
| O                                   | -4.430430000  | 9.606975000  | 31.527937000 | H | -6.802234000  | 10.750523000 | 20.507614000 |
| O                                   | -6.105916000  | 9.733730000  | 33.048016000 | H | -8.413839000  | 11.303084000 | 21.116722000 |
| H                                   | -6.744608000  | 9.641113000  | 32.179866000 | H | -10.288762000 | 9.342763000  | 22.468256000 |
| C                                   | -5.060986000  | 10.176655000 | 37.938072000 | H | -8.614012000  | 9.742599000  | 22.939422000 |
| H                                   | -5.584588000  | 11.047599000 | 37.484660000 | N | -9.622668000  | 9.756622000  | 23.116469000 |
| H                                   | -5.594645000  | 9.245500000  | 37.644052000 | C | -10.088748000 | 10.607452000 | 24.066147000 |
| H                                   | -5.077833000  | 10.273986000 | 39.039199000 | N | -11.416891000 | 10.785931000 | 24.172424000 |
|                                     |               |              |              | C | -11.784706000 | 11.633836000 | 25.160822000 |
| <b>Dimer: T---AR (OMe acceptor)</b> |               |              |              | N | -13.116003000 | 11.862082000 | 25.305999000 |

|                                            |               |              |              |   |               |              |              |
|--------------------------------------------|---------------|--------------|--------------|---|---------------|--------------|--------------|
| H                                          | -13.772883000 | 11.361136000 | 24.712521000 | H | -3.399847000  | 8.957240000  | 26.925435000 |
| H                                          | -13.436301000 | 12.461389000 | 26.062972000 | H | -3.145934000  | 7.361710000  | 27.736752000 |
| N                                          | -10.959478000 | 12.278871000 | 26.015860000 | H | -1.755689000  | 8.506176000  | 27.530650000 |
| C                                          | -9.653798000  | 12.024464000 | 25.818862000 | H | -11.289935000 | 6.212385000  | 23.391580000 |
| H                                          | -9.086452000  | 13.173021000 | 27.413582000 | H | -9.556086000  | 6.137566000  | 23.879962000 |
| H                                          | -7.763244000  | 12.342909000 | 26.556408000 | N | -10.576782000 | 6.132592000  | 24.114515000 |
| N                                          | -8.745453000  | 12.625325000 | 26.626812000 | C | -10.960477000 | 6.402860000  | 25.370951000 |
| N                                          | -9.160161000  | 11.205346000 | 24.852736000 | N | -12.278066000 | 6.539400000  | 25.638556000 |
|                                            |               |              |              | C | -12.562877000 | 6.867749000  | 26.907803000 |
| <b>Stacked-Dimer: T---AR (CO acceptor)</b> |               |              |              | N | -13.874384000 | 7.157431000  | 27.189591000 |
| C                                          | -5.597481000  | 6.590501000  | 24.345933000 | H | -14.565871000 | 6.813419000  | 26.522957000 |
| C                                          | -4.681145000  | 7.077350000  | 25.307965000 | H | -14.132534000 | 7.194994000  | 28.175822000 |
| H                                          | -5.067468000  | 7.456496000  | 26.261626000 | N | -11.686849000 | 6.976429000  | 27.932044000 |
| C                                          | -5.126909000  | 6.114588000  | 23.106984000 | C | -10.408709000 | 6.804412000  | 27.565744000 |
| H                                          | -5.865507000  | 5.763322000  | 22.374067000 | H | -9.777007000  | 6.975594000  | 29.495410000 |
| C                                          | -3.757408000  | 6.101490000  | 22.821916000 | H | -8.513277000  | 6.614649000  | 28.339027000 |
| H                                          | -3.371291000  | 5.740675000  | 21.858069000 | N | -9.447890000  | 6.978211000  | 28.530068000 |
| C                                          | -2.842241000  | 6.587894000  | 23.767267000 | N | -9.978489000  | 6.523045000  | 26.316945000 |
| O                                          | -1.515472000  | 6.613789000  | 23.501671000 | C | -4.544747000  | 9.770730000  | 23.255436000 |
| H                                          | -1.093347000  | 7.090771000  | 24.249745000 | C | -3.945914000  | 10.348717000 | 24.399959000 |
| C                                          | -3.317635000  | 7.084059000  | 25.013091000 | H | -4.597502000  | 10.709081000 | 25.205962000 |
| O                                          | -2.311452000  | 7.553352000  | 25.825030000 | C | -3.737990000  | 9.317085000  | 22.197907000 |
| C                                          | -7.060150000  | 6.557206000  | 24.604142000 | H | -4.231775000  | 8.880295000  | 21.319232000 |
| O                                          | -7.859343000  | 6.185591000  | 23.732340000 | C | -2.340575000  | 9.389867000  | 22.284194000 |
| O                                          | -7.434449000  | 6.923327000  | 25.831699000 | H | -1.692722000  | 9.006688000  | 21.483800000 |
| H                                          | -8.475648000  | 6.749745000  | 25.949419000 | C | -1.740224000  | 9.917517000  | 23.435682000 |
| C                                          | -2.681645000  | 8.120335000  | 27.067581000 | O | -0.389348000  | 9.949326000  | 23.578523000 |

|   |               |              |              |                                             |               |              |              |
|---|---------------|--------------|--------------|---------------------------------------------|---------------|--------------|--------------|
| H | -0.229043000  | 10.407076000 | 24.433465000 | <b>Stacked-Dimer: T---AR (OMe acceptor)</b> |               |              |              |
| C | -2.557164000  | 10.425390000 | 24.482662000 | C                                           | -9.049842000  | 8.626469000  | 11.057856000 |
| O | -1.833867000  | 10.942372000 | 25.539222000 | C                                           | -7.809197000  | 8.824142000  | 11.699193000 |
| C | -6.023892000  | 9.586580000  | 23.189987000 | H                                           | -6.905982000  | 8.466239000  | 11.192349000 |
| O | -6.590300000  | 9.174242000  | 22.164709000 | C                                           | -10.233289000 | 9.031809000  | 11.703072000 |
| O | -6.645692000  | 9.887064000  | 24.317989000 | H                                           | -11.193598000 | 8.847421000  | 11.201118000 |
| H | -7.701509000  | 9.670225000  | 24.257920000 | C                                           | -10.173218000 | 9.625560000  | 12.964322000 |
| C | -2.517518000  | 11.783272000 | 26.455325000 | H                                           | -11.085069000 | 9.938175000  | 13.493538000 |
| H | -3.047319000  | 12.606861000 | 25.928344000 | C                                           | -8.942576000  | 9.824966000  | 13.626588000 |
| H | -3.259961000  | 11.218154000 | 27.062171000 | O                                           | -8.956789000  | 10.364007000 | 14.856790000 |
| H | -1.752166000  | 12.206301000 | 27.132237000 | H                                           | -8.084561000  | 10.793207000 | 15.205999000 |
| H | -10.013399000 | 9.014459000  | 21.283134000 | C                                           | -7.748024000  | 9.406775000  | 12.969400000 |
| H | -8.367558000  | 9.067464000  | 22.029319000 | O                                           | -6.564365000  | 9.572302000  | 13.672150000 |
| N | -9.409567000  | 9.100337000  | 22.097746000 | C                                           | -9.150631000  | 7.858857000  | 9.789758000  |
| C | -9.995652000  | 9.264154000  | 23.296628000 | O                                           | -10.204125000 | 7.498753000  | 9.282790000  |
| N | -11.342810000 | 9.275837000  | 23.384800000 | O                                           | -7.935464000  | 7.535449000  | 9.268223000  |
| C | -11.824767000 | 9.433123000  | 24.635332000 | H                                           | -8.081889000  | 6.761217000  | 8.671332000  |
| N | -13.180479000 | 9.498905000  | 24.779452000 | C                                           | -5.410200000  | 8.932225000  | 13.140496000 |
| H | -13.721609000 | 9.160305000  | 23.984016000 | H                                           | -5.605699000  | 7.858130000  | 12.940833000 |
| H | -13.537263000 | 9.282870000  | 25.713489000 | H                                           | -5.066314000  | 9.414208000  | 12.198606000 |
| N | -11.093077000 | 9.537189000  | 25.771957000 | H                                           | -4.619854000  | 9.025193000  | 13.909834000 |
| C | -9.766786000  | 9.506356000  | 25.578485000 | H                                           | -4.142199000  | 11.433293000 | 15.752903000 |
| H | -9.383975000  | 9.397040000  | 27.563562000 | H                                           | -5.543569000  | 10.949447000 | 14.767044000 |
| H | -8.001671000  | 9.221357000  | 26.532500000 | N                                           | -5.138161000  | 11.238098000 | 15.663953000 |
| N | -8.943115000  | 9.601293000  | 26.664941000 | C                                           | -5.982764000  | 11.835889000 | 16.555000000 |
| N | -9.165387000  | 9.401249000  | 24.370034000 | N                                           | -5.455004000  | 12.376863000 | 17.663365000 |
|   |               |              |              | C                                           | -6.373745000  | 12.829340000 | 18.544539000 |

|   |               |              |              |                |               |              |              |
|---|---------------|--------------|--------------|----------------|---------------|--------------|--------------|
| N | -5.903084000  | 13.358548000 | 19.702661000 | H              | -4.877505000  | 6.008361000  | 14.388519000 |
| H | -4.897708000  | 13.410062000 | 19.849399000 | H              | -5.389314000  | 5.985529000  | 16.120000000 |
| H | -6.553663000  | 13.765876000 | 20.369887000 | H              | -5.996123000  | 9.269083000  | 16.741979000 |
| N | -7.717068000  | 12.791984000 | 18.388223000 | H              | -6.735295000  | 8.019968000  | 15.752318000 |
| C | -8.127956000  | 12.266067000 | 17.215439000 | N              | -6.680537000  | 8.516196000  | 16.649112000 |
| H | -10.083635000 | 12.369452000 | 17.748907000 | C              | -7.858833000  | 8.665518000  | 17.307036000 |
| H | -9.762421000  | 11.610961000 | 16.187283000 | N              | -7.929527000  | 9.568710000  | 18.300941000 |
| N | -9.458424000  | 12.216908000 | 16.959594000 | C              | -9.148203000  | 9.683643000  | 18.873038000 |
| N | -7.297843000  | 11.789163000 | 16.250887000 | N              | -9.281363000  | 10.628456000 | 19.850671000 |
| C | -7.744075000  | 5.142278000  | 11.390197000 | H              | -8.628632000  | 11.422733000 | 19.795707000 |
| C | -6.980071000  | 5.435370000  | 12.545848000 | H              | -10.236733000 | 10.810423000 | 20.158256000 |
| H | -5.894556000  | 5.275656000  | 12.519225000 | N              | -10.247150000 | 8.962953000  | 18.556898000 |
| C | -9.143064000  | 5.314329000  | 11.426063000 | C              | -10.060833000 | 8.072821000  | 17.564600000 |
| H | -9.732258000  | 5.088683000  | 10.527178000 | H              | -12.031090000 | 7.569026000  | 17.557034000 |
| C | -9.762138000  | 5.805293000  | 12.575288000 | H              | -11.057021000 | 6.816063000  | 16.285064000 |
| H | -10.849093000 | 5.961941000  | 12.610351000 | N              | -11.120733000 | 7.315207000  | 17.177820000 |
| C | -9.012603000  | 6.165952000  | 13.717750000 | N              | -8.886858000  | 7.871634000  | 16.910763000 |
| O | -9.639503000  | 6.671789000  | 14.777083000 |                |               |              |              |
| H | -9.063841000  | 7.068765000  | 15.568900000 | <b>Model A</b> |               |              |              |
| C | -7.598636000  | 5.952396000  | 13.684788000 | N              | 0.081104000   | -0.497040000 | 0.614357000  |
| O | -6.919439000  | 6.312986000  | 14.829949000 | H              | -0.931436000  | -0.450514000 | 0.762472000  |
| C | -7.100391000  | 4.743631000  | 10.124962000 | H              | 0.478715000   | -0.566920000 | -0.319886000 |
| O | -7.633764000  | 4.754930000  | 9.016074000  | C              | 0.910331000   | -0.193255000 | 1.641359000  |
| O | -5.793624000  | 4.377200000  | 10.269860000 | N              | 2.228556000   | -0.109880000 | 1.395057000  |
| H | -5.487315000  | 4.183713000  | 9.357505000  | C              | 2.995242000   | 0.180485000  | 2.468356000  |
| C | -5.673270000  | 5.681928000  | 15.095152000 | N              | 4.324204000   | 0.289272000  | 2.315881000  |
| H | -5.768763000  | 4.576357000  | 15.038160000 | H              | 4.702891000   | 0.162136000  | 1.379215000  |

|   |              |              |             |   |              |              |              |
|---|--------------|--------------|-------------|---|--------------|--------------|--------------|
| H | 4.916741000  | 0.578484000  | 3.128755000 | C | 5.928271000  | 1.046612000  | 7.015168000  |
| N | 2.504575000  | 0.378180000  | 3.730095000 | C | 5.354732000  | 0.731785000  | 8.267911000  |
| C | 1.165062000  | 0.298797000  | 3.866472000 | H | 4.320402000  | 0.366880000  | 8.287055000  |
| N | 0.321523000  | 0.002604000  | 2.855861000 | C | 7.254799000  | 1.516867000  | 6.964369000  |
| N | 0.627223000  | 0.535674000  | 5.085783000 | H | 7.690595000  | 1.752283000  | 5.983032000  |
| H | -0.385959000 | 0.411156000  | 5.194638000 | C | 7.991101000  | 1.671639000  | 8.141667000  |
| H | 1.236084000  | 0.786772000  | 5.862712000 | H | 9.028956000  | 2.035848000  | 8.122887000  |
| C | -5.632248000 | -0.817203000 | 4.636788000 | C | 7.440803000  | 1.349535000  | 9.402933000  |
| C | -4.353480000 | -0.933347000 | 5.226701000 | O | 8.196157000  | 1.503695000  | 10.498985000 |
| H | -4.290345000 | -1.252027000 | 6.274735000 | H | 7.801908000  | 1.132167000  | 11.388411000 |
| C | -5.733773000 | -0.416171000 | 3.289975000 | C | 6.092413000  | 0.876498000  | 9.446068000  |
| H | -6.734061000 | -0.337560000 | 2.840857000 | O | 5.597526000  | 0.573624000  | 10.700082000 |
| C | -4.583477000 | -0.122701000 | 2.553822000 | C | 4.463403000  | -0.280637000 | 10.765078000 |
| H | -4.643583000 | 0.195832000  | 1.502675000 | H | 4.627847000  | -1.209543000 | 10.177193000 |
| C | -3.295243000 | -0.230118000 | 3.126260000 | H | 3.541465000  | 0.220085000  | 10.393467000 |
| O | -2.225229000 | 0.060846000  | 2.377437000 | H | 4.330859000  | -0.537985000 | 11.832848000 |
| H | -1.292047000 | -0.013381000 | 2.831618000 | C | 5.158185000  | 0.874523000  | 5.754232000  |
| C | -3.201534000 | -0.651282000 | 4.488604000 | O | 5.677810000  | 1.045685000  | 4.638875000  |
| O | -1.920510000 | -0.761602000 | 4.999908000 | O | 3.888666000  | 0.519553000  | 5.926335000  |
| C | -1.730529000 | -1.636432000 | 6.105720000 | H | 3.394609000  | 0.463331000  | 4.987845000  |
| H | -2.168166000 | -2.637049000 | 5.900425000 | C | 8.279029000  | -0.574988000 | 15.307518000 |
| H | -2.179691000 | -1.233444000 | 7.040729000 | N | 9.293880000  | -0.611891000 | 14.416810000 |
| H | -0.636414000 | -1.729207000 | 6.241557000 | C | 9.026994000  | -0.055209000 | 13.223942000 |
| C | -6.866255000 | -1.102601000 | 5.416293000 | N | 9.991597000  | -0.061973000 | 12.274648000 |
| O | -7.992592000 | -1.087525000 | 4.892475000 | H | 10.904961000 | -0.443514000 | 12.510155000 |
| O | -6.658983000 | -1.368451000 | 6.702602000 | H | 9.817166000  | 0.418313000  | 11.386399000 |
| H | -7.591020000 | -1.454025000 | 7.207022000 | N | 7.842980000  | 0.524349000  | 12.873759000 |

|   |               |              |              |   |              |              |              |
|---|---------------|--------------|--------------|---|--------------|--------------|--------------|
| C | 6.894491000   | 0.529562000  | 13.831534000 | H | 4.862597000  | -1.851920000 | 20.148235000 |
| N | 7.057776000   | -0.008692000 | 15.056816000 | C | 2.712383000  | -1.746727000 | 20.495006000 |
| N | 5.712864000   | 1.127889000  | 13.539877000 | H | 2.739285000  | -2.195568000 | 21.498911000 |
| H | 4.954173000   | 1.091812000  | 14.219070000 | C | 1.448475000  | -1.366266000 | 19.989330000 |
| H | 5.544495000   | 1.379860000  | 12.560580000 | O | 0.359919000  | -1.567592000 | 20.742025000 |
| N | 8.452667000   | -1.119942000 | 16.520980000 | H | -0.548449000 | -1.251925000 | 20.343005000 |
| H | 7.660093000   | -1.130830000 | 17.204965000 | C | 1.396931000  | -0.783969000 | 18.684700000 |
| H | 9.347049000   | -1.567723000 | 16.712290000 | O | 0.136204000  | -0.446990000 | 18.228643000 |
| H | -11.210519000 | -1.982158000 | 5.991146000  | C | 5.073172000  | -0.782383000 | 17.692825000 |
| H | -9.465153000  | -1.602523000 | 5.708269000  | O | 6.176320000  | -1.157019000 | 18.124284000 |
| N | -10.263656000 | -1.844524000 | 6.340120000  | O | 4.907264000  | -0.199810000 | 16.509280000 |
| C | -10.103351000 | -1.735293000 | 7.668719000  | H | 5.833844000  | -0.137829000 | 15.995547000 |
| N | -11.174088000 | -1.877378000 | 8.479433000  | C | 0.048773000  | 0.507846000  | 17.179489000 |
| C | -10.918929000 | -1.736875000 | 9.791017000  | H | 0.619621000  | 1.428323000  | 17.428982000 |
| N | -11.944942000 | -1.876769000 | 10.665659000 | H | 0.425272000  | 0.103339000  | 16.213316000 |
| H | -12.885437000 | -1.968335000 | 10.286794000 | H | -1.024533000 | 0.754355000  | 17.073839000 |
| H | -11.795702000 | -1.619874000 | 11.645824000 | H | -3.230954000 | -1.445147000 | 17.377525000 |
| N | -9.697717000  | -1.462625000 | 10.331896000 | H | -1.563068000 | -1.447736000 | 18.018329000 |
| C | -8.688797000  | -1.331128000 | 9.445289000  | N | -2.578913000 | -1.412070000 | 18.160010000 |
| H | -7.352980000  | -0.948402000 | 10.945939000 | C | -3.018427000 | -0.989562000 | 19.370539000 |
| H | -6.693313000  | -0.868912000 | 9.277607000  | N | -4.333720000 | -0.737428000 | 19.526350000 |
| N | -7.462127000  | -1.025022000 | 9.927580000  | C | -4.725083000 | -0.318375000 | 20.769077000 |
| N | -8.835045000  | -1.481704000 | 8.113031000  | N | -6.027045000 | -0.035454000 | 20.927803000 |
| C | 3.821719000   | -0.968048000 | 18.474096000 | H | -6.671761000 | -0.072940000 | 20.103860000 |
| C | 2.567348000   | -0.581888000 | 17.949252000 | H | -6.326512000 | 0.301430000  | 21.841021000 |
| H | 2.538362000   | -0.129450000 | 16.950226000 | N | -3.887207000 | -0.182523000 | 21.820194000 |
| C | 3.880636000   | -1.554702000 | 19.753573000 | C | -2.600816000 | -0.472897000 | 21.565016000 |

|                |               |              |              |   |              |              |              |
|----------------|---------------|--------------|--------------|---|--------------|--------------|--------------|
| H              | -2.041472000  | -0.145443000 | 23.505107000 | N | 3.891774000  | 10.192982000 | 19.406322000 |
| H              | -0.738935000  | -0.678582000 | 22.412220000 | C | 3.851331000  | 10.179002000 | 18.045948000 |
| N              | -1.701350000  | -0.367647000 | 22.572069000 | N | 4.929914000  | 10.651858000 | 17.390173000 |
| N              | -2.106433000  | -0.861678000 | 20.355639000 | H | 5.720922000  | 11.110296000 | 17.906321000 |
| C              | -7.851513000  | -0.690418000 | 16.270242000 | H | 4.902255000  | 10.603970000 | 16.373172000 |
| C              | -7.297004000  | -1.204031000 | 15.075881000 | N | 2.817130000  | 9.712402000  | 17.302425000 |
| H              | -6.262749000  | -1.569846000 | 15.095514000 | C | 1.763980000  | 9.288341000  | 18.015224000 |
| C              | -9.180387000  | -0.222526000 | 16.265079000 | N | 1.675696000  | 9.301986000  | 19.368369000 |
| H              | -9.599884000  | 0.170616000  | 17.202052000 | N | 0.680788000  | 8.819753000  | 17.338860000 |
| C              | -9.937036000  | -0.259231000 | 15.091472000 | H | -0.098247000 | 8.408839000  | 17.851206000 |
| H              | -10.976288000 | 0.100419000  | 15.069464000 | H | 0.740706000  | 8.738628000  | 16.326629000 |
| C              | -9.399514000  | -0.764182000 | 13.885320000 | N | 2.730562000  | 9.728605000  | 21.374427000 |
| O              | -10.164948000 | -0.781254000 | 12.788489000 | H | 1.914888000  | 9.273372000  | 21.849185000 |
| H              | -9.720260000  | -1.102059000 | 11.904345000 | H | 3.534382000  | 10.070486000 | 21.896376000 |
| C              | -8.052031000  | -1.240440000 | 13.901380000 | C | -1.838795000 | 7.882096000  | 22.282331000 |
| O              | -7.574226000  | -1.729044000 | 12.698365000 | C | -3.032654000 | 7.916170000  | 21.526184000 |
| C              | -6.488684000  | -2.647229000 | 12.744921000 | H | -2.980721000 | 8.294672000  | 20.498061000 |
| H              | -6.703894000  | -3.481797000 | 13.446406000 | C | -1.873085000 | 7.395709000  | 23.603056000 |
| H              | -5.538056000  | -2.156596000 | 13.051725000 | H | -0.938403000 | 7.379280000  | 24.181374000 |
| H              | -6.375081000  | -3.043082000 | 11.718091000 | C | -3.078279000 | 6.954075000  | 24.156486000 |
| C              | -7.053115000  | -0.623886000 | 17.523004000 | H | -3.127096000 | 6.571323000  | 25.186856000 |
| O              | -7.533136000  | -0.191247000 | 18.584165000 | C | -4.286085000 | 6.999209000  | 23.425310000 |
| O              | -5.801318000  | -1.055123000 | 17.406423000 | O | -5.417671000 | 6.575948000  | 24.009098000 |
| H              | -5.282313000  | -0.923293000 | 18.324145000 | H | -6.297206000 | 6.901858000  | 23.553177000 |
| <b>Model B</b> |               |              |              | C | -4.241678000 | 7.485417000  | 22.080835000 |
|                |               |              |              | O | -5.443162000 | 7.499297000  | 21.403236000 |
| C              | 2.779822000   | 9.746789000  | 20.030603000 | C | -0.554751000 | 8.365491000  | 21.706583000 |



|   |               |              |              |   |               |              |              |
|---|---------------|--------------|--------------|---|---------------|--------------|--------------|
| O | 0.478291000   | 8.452747000  | 22.392427000 | H | -11.210203000 | 9.689824000  | 27.466434000 |
| O | -0.614114000  | 8.696629000  | 20.421733000 | N | -9.909572000  | 9.916264000  | 29.518399000 |
| H | 0.353142000   | 8.973549000  | 20.064121000 | C | -9.018891000  | 9.967761000  | 30.518288000 |
| C | -5.501372000  | 8.252016000  | 20.201790000 | N | -7.675161000  | 9.854190000  | 30.376753000 |
| H | -5.160229000  | 9.298116000  | 20.362885000 | N | -9.484502000  | 10.164729000 | 31.781858000 |
| H | -4.886108000  | 7.796502000  | 19.393571000 | H | -8.845929000  | 10.073242000 | 32.571534000 |
| H | -6.562831000  | 8.257873000  | 19.891042000 | H | -10.491539000 | 10.149467000 | 31.927203000 |
| H | -8.887190000  | 6.824171000  | 20.504653000 | N | -5.898508000  | 9.487714000  | 28.953850000 |
| H | -7.323141000  | 6.455907000  | 21.260668000 | H | -5.301154000  | 9.370026000  | 29.806049000 |
| N | -8.295918000  | 6.765629000  | 21.331244000 | H | -5.534691000  | 9.307318000  | 28.020629000 |
| C | -8.632920000  | 7.523230000  | 22.408514000 | C | -4.405970000  | 9.145188000  | 33.758913000 |
| N | -9.806013000  | 8.186029000  | 22.375952000 | C | -5.004038000  | 9.517189000  | 34.984238000 |
| C | -10.074903000 | 8.884411000  | 23.498036000 | H | -5.982338000  | 10.013320000 | 34.956928000 |
| N | -11.253250000 | 9.573128000  | 23.525522000 | C | -3.146848000  | 8.512871000  | 33.774174000 |
| H | -11.766450000 | 9.650975000  | 22.648867000 | H | -2.689999000  | 8.233630000  | 32.814008000 |
| H | -11.377746000 | 10.292476000 | 24.235841000 | C | -2.505532000  | 8.246444000  | 34.986395000 |
| N | -9.299675000  | 8.951262000  | 24.602229000 | H | -1.523092000  | 7.752550000  | 35.017192000 |
| C | -8.133242000  | 8.257627000  | 24.533411000 | C | -3.089842000  | 8.604164000  | 36.223663000 |
| H | -7.552345000  | 8.787149000  | 26.470927000 | O | -2.436509000  | 8.325602000  | 37.356123000 |
| H | -6.459396000  | 7.694237000  | 25.509699000 | H | -2.901897000  | 8.574252000  | 38.253866000 |
| N | -7.302096000  | 8.274121000  | 25.585691000 | C | -4.361924000  | 9.255573000  | 36.196588000 |
| N | -7.759785000  | 7.537935000  | 23.438618000 | O | -4.887136000  | 9.597276000  | 37.430324000 |
| C | -7.226726000  | 9.636857000  | 29.109645000 | C | -5.093577000  | 9.389174000  | 32.462626000 |
| N | -8.041661000  | 9.567861000  | 28.033528000 | O | -4.564713000  | 9.099909000  | 31.375759000 |
| C | -9.369703000  | 9.723844000  | 28.289000000 | O | -6.304209000  | 9.926807000  | 32.568420000 |
| N | -10.216681000 | 9.675471000  | 27.241055000 | H | -6.781577000  | 9.937431000  | 31.612413000 |
| H | -9.883443000  | 9.446501000  | 26.273361000 | C | -5.857072000  | 10.635874000 | 37.466191000 |

|   |              |              |              |   |              |              |              |
|---|--------------|--------------|--------------|---|--------------|--------------|--------------|
| H | -5.491118000 | 11.540630000 | 36.934457000 | N | 8.342067000  | 11.911620000 | 20.872010000 |
| H | -6.824639000 | 10.322500000 | 37.014108000 | C | 9.149572000  | 12.829500000 | 20.290229000 |
| H | -6.018169000 | 10.871016000 | 38.535267000 | H | 10.390154000 | 12.808918000 | 21.923906000 |
| H | -6.133055000 | 8.472171000  | 40.618747000 | H | 10.831058000 | 13.951937000 | 20.610991000 |
| H | -5.330000000 | 8.585881000  | 39.019244000 | N | 10.222930000 | 13.239501000 | 21.007074000 |
| N | -5.295653000 | 8.508134000  | 40.042458000 | N | 8.955920000  | 13.369224000 | 19.069270000 |
| C | -4.095066000 | 8.629494000  | 40.657384000 | H | 15.013522000 | 9.650569000  | 27.380511000 |
| N | -4.075695000 | 8.657970000  | 42.006340000 | H | 16.676056000 | 9.524000000  | 27.981075000 |
| C | -2.840293000 | 8.732373000  | 42.537458000 | N | 15.674050000 | 9.418727000  | 28.120537000 |
| N | -2.751019000 | 8.745517000  | 43.899945000 | C | 15.223977000 | 9.089369000  | 29.360781000 |
| H | -3.616614000 | 8.869117000  | 44.422670000 | N | 13.878857000 | 9.012572000  | 29.520013000 |
| H | -1.870084000 | 9.034274000  | 44.322355000 | C | 13.448363000 | 8.693749000  | 30.772740000 |
| N | -1.677438000 | 8.766101000  | 41.850940000 | N | 12.120363000 | 8.618481000  | 30.965246000 |
| C | -1.801710000 | 8.757871000  | 40.497909000 | H | 11.469983000 | 8.827625000  | 30.170092000 |
| H | 0.260272000  | 8.787553000  | 40.214883000 | H | 11.779476000 | 8.333763000  | 31.881131000 |
| H | -0.791163000 | 8.680110000  | 38.741491000 | N | 14.283708000 | 8.461829000  | 31.809437000 |
| N | -0.684637000 | 8.800469000  | 39.753110000 | C | 15.612387000 | 8.541349000  | 31.528473000 |
| N | -3.003280000 | 8.707927000  | 39.859813000 | H | 16.127281000 | 8.063518000  | 33.499581000 |
| H | 6.702897000  | 13.267831000 | 16.774923000 | H | 17.461802000 | 8.430234000  | 32.339878000 |
| H | 8.175951000  | 14.212028000 | 16.892155000 | N | 16.472432000 | 8.287767000  | 32.535260000 |
| N | 7.629841000  | 13.400010000 | 17.176370000 | N | 16.134362000 | 8.858045000  | 30.317665000 |
| C | 7.866742000  | 12.903550000 | 18.426739000 | C | 10.285108000 | 9.960740000  | 26.489854000 |
| N | 6.998743000  | 11.979543000 | 18.893310000 | C | 10.880025000 | 10.365492000 | 25.273213000 |
| C | 7.260498000  | 11.520421000 | 20.145254000 | H | 11.974916000 | 10.358818000 | 25.201547000 |
| N | 6.415999000  | 10.631099000 | 20.693479000 | C | 8.880766000  | 9.962756000  | 26.602810000 |
| H | 5.490014000  | 10.432840000 | 20.231863000 | H | 8.432756000  | 9.645361000  | 27.555106000 |
| H | 6.596544000  | 10.366468000 | 21.666320000 | C | 8.087305000  | 10.359586000 | 25.524319000 |

|   |              |              |              |   |              |              |              |
|---|--------------|--------------|--------------|---|--------------|--------------|--------------|
| H | 6.989375000  | 10.362135000 | 25.591822000 | H | 13.498583000 | 8.869384000  | 39.219974000 |
| C | 8.661569000  | 10.769015000 | 24.299105000 | H | 15.010022000 | 8.115527000  | 39.790496000 |
| O | 7.855607000  | 11.134855000 | 23.296475000 | C | 8.046976000  | 9.642332000  | 38.295969000 |
| H | 8.307079000  | 11.442720000 | 22.409144000 | C | 9.145268000  | 8.917274000  | 38.812276000 |
| C | 10.087436000 | 10.769924000 | 24.196144000 | H | 8.961407000  | 8.216459000  | 39.635851000 |
| O | 10.598470000 | 11.188304000 | 22.980904000 | C | 8.258280000  | 10.552788000 | 37.242485000 |
| C | 11.921491000 | 10.789149000 | 22.648899000 | H | 7.395313000  | 11.109206000 | 36.850008000 |
| H | 12.043215000 | 9.689059000  | 22.751576000 | C | 9.538787000  | 10.729386000 | 36.711719000 |
| H | 12.683454000 | 11.294660000 | 23.283520000 | H | 9.723310000  | 11.428964000 | 35.883001000 |
| H | 12.076818000 | 11.084486000 | 21.594050000 | C | 10.648030000 | 10.006352000 | 37.205978000 |
| C | 11.111906000 | 9.549022000  | 27.655458000 | O | 11.852053000 | 10.207052000 | 36.654664000 |
| O | 10.592831000 | 9.207187000  | 28.732224000 | H | 12.606904000 | 9.546527000  | 36.940556000 |
| O | 12.423176000 | 9.584835000  | 27.450886000 | C | 10.427698000 | 9.096008000  | 38.286418000 |
| H | 12.948789000 | 9.314230000  | 28.340962000 | O | 11.546079000 | 8.429076000  | 38.747208000 |
| N | 13.527208000 | 8.875362000  | 34.528247000 | C | 11.336150000 | 7.268267000  | 39.536626000 |
| H | 12.728592000 | 9.455374000  | 34.804268000 | H | 10.666499000 | 6.546534000  | 39.019862000 |
| H | 13.780104000 | 8.706909000  | 33.519273000 | H | 10.899467000 | 7.511844000  | 40.531203000 |
| C | 14.322515000 | 8.432933000  | 35.514126000 | H | 12.332048000 | 6.808662000  | 39.681258000 |
| N | 15.457283000 | 7.759594000  | 35.188503000 | C | 6.677283000  | 9.457860000  | 38.847431000 |
| C | 16.195354000 | 7.336026000  | 36.237658000 | O | 5.700346000  | 10.079557000 | 38.395177000 |
| N | 17.343188000 | 6.655500000  | 35.950164000 | O | 6.594054000  | 8.587123000  | 39.846123000 |
| H | 17.462799000 | 6.284673000  | 35.008965000 | H | 5.588082000  | 8.528674000  | 40.206153000 |
| H | 17.825976000 | 6.205917000  | 36.726407000 | H | 2.270558000  | 10.136614000 | 39.085746000 |
| N | 15.918735000 | 7.539941000  | 37.541661000 | H | 4.049031000  | 9.870044000  | 38.940695000 |
| C | 14.783845000 | 8.234012000  | 37.761435000 | N | 3.118977000  | 9.650837000  | 39.369415000 |
| N | 13.948503000 | 8.684328000  | 36.798829000 | C | 3.066304000  | 8.859919000  | 40.456341000 |
| N | 14.444761000 | 8.516716000  | 39.045416000 | N | 1.879617000  | 8.637755000  | 41.063269000 |

|   |              |             |              |
|---|--------------|-------------|--------------|
| C | 1.923639000  | 7.845747000 | 42.170030000 |
| N | 0.766012000  | 7.632610000 | 42.825369000 |
| H | -0.131512000 | 8.069799000 | 42.502439000 |
| H | 0.797600000  | 6.988595000 | 43.613703000 |
| N | 3.041214000  | 7.256953000 | 42.664327000 |
| C | 4.160687000  | 7.517592000 | 41.975599000 |
| H | 5.298165000  | 6.371848000 | 43.239026000 |
| H | 6.196615000  | 7.151751000 | 41.924490000 |
| N | 5.319429000  | 6.946783000 | 42.400349000 |
| N | 4.239680000  | 8.313015000 | 40.879766000 |

## References:

1. N. Schädel, E. Icik, M. Martini, L. Altevogt, I. Ramming, A. Greulich, A. Baro, U. Bilitewski and S. Laschat, *Synthesis* 2021, **53**, 2260-2268.
2. F. Neese, *Comput. Mol. Sci.* 2022, **12**, e1606.
3. J. P. Perdew, *Phys. Rev. B* 1986, **33**, 8822–8824.
4. S. Grimme, J. Antony, S. Ehrlich and H. Krieg, *J. Chem. Phys.* 2010, **132**, 154104.
5. A. D. Becke, *J. Chem. Phys.*, 1993, **98**, 1372–1377.
6. M. Cossi, N. Rega, G. Scalmani and V. Barone, *J. Comput. Chem.*, 2003, **24**, 669–681.
